# Supplementary material for: Evolutionary dynamics of canine kobuvirus in Vietnam and Thailand reveal the evidence of viral ability to evade host immunity
Source: PubMed Central journal article supplement (PMC11130191; doi:10.1038/s41598-024-62833-2), 2024-05-27
Supplement: 41598_2024_62833_MOESM1_ESM.pdf [file 41598_2024_62833_MOESM1_ESM.pdf]

## *Supplementary Material*

**Evolutionary dynamics of canine kobuvirus in Vietnam and Thailand reveal the evidence of viral ability to evade host immunity.**

**Tin Van Nguyen<sup>1,2,3</sup>, Tanit Kasantikul<sup>4</sup>, Chutchai Piewbang<sup>3,5,\*</sup> and Somporn Techangamsuwan<sup>3,5,\*</sup>**

<sup>1</sup>The International Graduate Program of Veterinary Science and Technology (VST), Faculty of Veterinary Science, Chulalongkorn University, Bangkok, Thailand.

<sup>2</sup>Faculty of Animal Science and Veterinary Medicine, Nong Lam University, Ho Chi Minh City, Vietnam.

<sup>3</sup>Animal Virome and Diagnostic Development Research Unit, Faculty of Veterinary Science, Chulalongkorn University, Bangkok, Thailand.

<sup>4</sup>Veterinary Diagnostic Laboratory, Department of Pathobiology and Diagnostic Investigation, College of Veterinary Medicine, Michigan State University, East Lansing, MI, USA.

<sup>5</sup>Department of Pathology, Faculty of Veterinary Science, Chulalongkorn University, Bangkok, Thailand.

**Supplementary Table 1** List of primers used for detection<sup>a</sup> and amplification<sup>b</sup> the 7 regions of canine kobuvirus (CaKoV) genome.

| Direction                                                      | Sequence (5'-3')       | Genome position | Product size (bp) |
|----------------------------------------------------------------|------------------------|-----------------|-------------------|
| <b>Primers for CaKoV detection</b>                             |                        |                 |                   |
| Forward                                                        | CATCCAYTCCATCCGCCATT   | 6917 - 7354     | 438               |
| Reverse                                                        | AAATCTCCRTCACGCARCCA   |                 |                   |
| <b>Primers for amplification the 7 regions of CaKoV genome</b> |                        |                 |                   |
| Forward                                                        | GTGTCCAYTCTAATACCCCGAG | 625 - 2030      | 1406              |
| Reverse                                                        | GGGTRTTGTACATGGCAGC    |                 |                   |
| Forward                                                        | CACGGTCACYTGGGARCA     | 1087 - 3038     | 1232              |
| Reverse                                                        | GGACGTTRAAGGAYTCGCC    |                 |                   |
| Forward                                                        | GTGGACATCTTCAAYCCTGAT  | 2894 - 4163     | 1270              |
| Reverse                                                        | CCAATGAGAAGCCGGTGTT    |                 |                   |
| Forward                                                        | TGTCTACATCGTYCGTGCAG   | 3877 - 5289     | 1413              |
| Reverse                                                        | ATGTCGTCGATGAAGTGGAC   |                 |                   |
| Forward                                                        | CATGATGCATTACTCGGATTCC | 4894 - 6199     | 1306              |
| Reverse                                                        | GTAGAATCCRGACATGACRGC  |                 |                   |
| Forward                                                        | CTGGAAACCATAACCAACACC  | 5876 - 7134     | 1259              |
| Reverse                                                        | TAATCCGGATCYTCAAGYGTG  |                 |                   |
| Forward                                                        | CGACACCCAACCTCTTYCTCA  | 6832 - 8210     | 1379              |
| Reverse                                                        | TACRACCATGGCTTAGGGG    |                 |                   |

<sup>a</sup> Primers were designed based on the available CaKoV sequence JQ911763.

<sup>b</sup> Primers were designed based on the available CaKoV sequence MK201777.

**Supplementary Table 2** Co-detection of canine kobuvirus (CaKoV) with other common enteric viruses.

| <b>Co-detection scenario<sup>a</sup></b> | <b>Vietnam (%)</b> | <b>Thailand (%)</b> |
|------------------------------------------|--------------------|---------------------|
| Single CaKoV detection                   | 7/33<br>(21.2%)    | 9/17<br>(52.9%)     |
| Co-detection with CPV                    | 9/33<br>(27.3%)    | 0/17<br>(0%)        |
| Co-detection with CDV                    | 0/33<br>(0%)       | 0/17<br>(0%)        |
| Co-detection with CCoV                   | 2/33<br>(6.06%)    | 2/17<br>(11.8%)     |
| Co-detection with CaAstV                 | 4/33<br>(12.1%)    | 6/17<br>(35.3%)     |
| Co-detection with CPV, CCoV              | 0/33<br>(0%)       | 0/17<br>(0%)        |
| Co-detection with CPV, CaAstV            | 6/33<br>(18.2%)    | 0/17<br>(0%)        |
| Co-detection with CDV, CCoV              | 2/33<br>(6.1%)     | 0/17<br>(0%)        |
| Co-detection with CDV, CaAstV            | 1/33<br>(3%)       | 0/17<br>(0%)        |
| Co-detection with CPV, CCoV, CaAstV      | 1/33<br>(3%)       | 0/17<br>(0%)        |
| Co-detection with CPV, CDV, CCoV, CaAstV | 1/33<br>(3%)       | 0/17<br>(0%)        |

<sup>a</sup> canine parvovirus (CPV), canine distemper virus (CDV), canine coronavirus (CCoV), canine astrovirus (CaAstV)

**Supplementary Table 3** Information of Thai and Vietnamese canine kobuvirus (CaKoV) strains obtained from this study.

| <b>Dog no.</b> | <b>Time of collection</b> | <b>City, Country<sup>a</sup></b> | <b>Sex<sup>b</sup></b> | <b>Age (month)</b> | <b>Breed</b>  | <b>Clinical signs</b> | <b>Housing</b>  | <b>Vaccination history</b> | <b>Deworming</b> | <b>Interact with other pets</b> | <b>GenBank Accession number</b> |
|----------------|---------------------------|----------------------------------|------------------------|--------------------|---------------|-----------------------|-----------------|----------------------------|------------------|---------------------------------|---------------------------------|
| G50            | Sep 2021                  | BKK, TH                          | F                      | 3                  | Chihuahua     | Diarrhea              | Indoor          | Yes                        | Yes              | No                              | PP320358                        |
| S76            | Sep 2021                  | BKK, TH                          | M                      | 3                  | Yorkshire     | Healthy               | Indoor          | Yes                        | Yes              | Dogs                            | PP320359                        |
| S81            | Sep 2021                  | BKK, TH                          | M                      | 3                  | Yorkshire     | Healthy               | Indoor          | Yes                        | Yes              | Dogs                            | PP320360                        |
| F8             | Feb 2022                  | NST, TH                          | M                      | 30                 | Pomeranian    | Healthy               | Indoor          | Yes                        | Yes              | No                              | PP320361                        |
| V5             | Apr 2022                  | HCM, VN                          | M                      | 1                  | Mixed         | Diarrhea              | Indoor          | No                         | Yes              | Dogs                            | PP320362                        |
| V25            | Apr 2022                  | HCM, VN                          | F                      | 3                  | Vietnam Local | Diarrhea              | Indoor, outdoor | No                         | Yes              | Dogs                            | PP320363                        |
| V91            | Apr 2022                  | HCM, VN                          | M                      | 2                  | Vietnam Local | Diarrhea              | Indoor, outdoor | No                         | No               | Dogs, Cats                      | PP320364                        |
| V156           | Apr 2022                  | HCM, VN                          | M                      | 1                  | Poodle        | Diarrhea              | Indoor          | No                         | No               | Dogs                            | PP320365                        |
| V162           | Apr 2022                  | HCM, VN                          | F                      | 3                  | Mixed         | Diarrhea              | Indoor          | No                         | Yes              | Dogs                            | PP320366                        |
| V178           | Apr 2022                  | HCM, VN                          | M                      | 18                 | Vietnam Local | Diarrhea              | Indoor, outdoor | No                         | No               | No                              | PP320367                        |
| V180           | Apr 2022                  | HCM, VN                          | F                      | 1                  | Papillon      | Diarrhea              | Indoor          | Yes                        | Yes              | Dogs                            | PP320368                        |
| V194           | Apr 2022                  | HCM, VN                          | M                      | 2                  | Mixed         | Healthy               | Indoor, outdoor | Yes                        | Yes              | Dogs                            | PP320369                        |
| V196           | Apr 2022                  | HCM, VN                          | M                      | 2                  | Mixed         | Diarrhea              | Indoor, outdoor | No                         | No               | Dogs, Cats                      | PP320370                        |

<sup>a</sup> BKK, TH (Bangkok, Thailand); NST, TH (Nakhon Si Thammarat, Thailand); HCM, VN (Ho Chi Minh city, Vietnam)

<sup>b</sup> M (Male); F (Female)

**Supplementary Table 4** Similarity percentage of nucleotide (nt) and amino acid (aa) of Vietnamese and Thai canine kobuvirus (CaKoV) and other deposited sequences.

| <b>CaKoV genome</b> |    | <b>Within Vietnamese CaKoV sequences</b> | <b>Within Thai CaKoV sequences</b> | <b>Between Vietnamese and Thai CaKoV sequences</b> | <b>Between Vietnamese CaKoV sequences and others</b> | <b>Between Thai CaKoV sequences and others</b> |
|---------------------|----|------------------------------------------|------------------------------------|----------------------------------------------------|------------------------------------------------------|------------------------------------------------|
| The CDS             | nt | 95-97.3%                                 | 96.3-99.9%                         | 94.6-96.5%                                         | 83.4-89.6%                                           | 83.5-95.2%                                     |
|                     | aa | 92-96.4%                                 | 93.6-99.9%                         | 91.9-95%                                           | 79.6-94%                                             | 79.7-93.6%                                     |
| P1 region           | nt | 92.2-96.7%                               | 94.1-99.9%                         | 92.3-95.7%                                         | 88.1-96.8%                                           | 88.3-95.9%                                     |
|                     | aa | 85-93.3%                                 | 88.2-91.9%                         | 84.8-92.5%                                         | 78-94.1%                                             | 79.4-92%                                       |
| VP1 gene            | nt | 86.2-97.6%                               | 91.7-94.7%                         | 86.8-95.4%                                         | 81.6-96.5%                                           | 82.1-96%                                       |
|                     | aa | 89.3-99.6%                               | 95-100%                            | 87.9-97.8%                                         | 80-97.8%                                             | 81.1-98.5%                                     |
| P2 region           | nt | 95.6-98.5%                               | 96.5-100%                          | 95.9-97.8%                                         | 93-97.7%                                             | 93.5-98.3%                                     |
|                     | aa | 99.6-100%                                | 100%                               | 99.8-100%                                          | 98.5-100%                                            | 98.6 -100%                                     |
| P3 region           | nt | 96.2-98%                                 | 96.1-100%                          | 95.7-97%                                           | 94-98.2%                                             | 93.7-97.2%                                     |
|                     | aa | 98.5-99.8%                               | 99.2-100%                          | 98.8-99.7%                                         | 97.8-100%                                            | 98-99.7%                                       |
| 3D gene             | nt | 96.7-98.3%                               | 96.7-100%                          | 96.2-97.6%                                         | 94-98.7%                                             | 93.8-98.3%                                     |
|                     | aa | 99.2-100%                                | 99.6-100%                          | 99.2-100%                                          | 98.1-100%                                            | 98.1-100%                                      |

**Supplementary Table 5** The putative cleavage sites of canine kobuvirus (CaKoV).

| Sequences                | Accession number      | Gene (Amino acid position) |           |            |             |             |             |             |             |             |             |
|--------------------------|-----------------------|----------------------------|-----------|------------|-------------|-------------|-------------|-------------|-------------|-------------|-------------|
|                          |                       | L/VP0                      | VP0/VP3   | VP3/VP1    | VP1/2A      | 2A/2B       | 2B/2C       | 2C/3A       | 3A/3B       | 3B/3C       | 3C/3D       |
|                          |                       | (171/172)                  | (553/554) | (776/777)  | (1054/1055) | (1165/1166) | (1330/1331) | (1665/1666) | (1759/1760) | (1786/1787) | (2176/2177) |
| V25/Vietnam/2022         | PP320363 (This study) | Q/G                        | Q/H       | Q/A        | Y/V         | Q/G         | Q/G         | Q/G         | Q/A         | Q/G         | Q/G         |
| V178/Vietnam/2022        | PP320367 (This study) | Q/G                        | Q/H       | Q/A        | Y/V         | Q/G         | Q/G         | Q/G         | Q/A         | Q/G         | Q/G         |
| V180/Vietnam/2022        | PP320368 (This study) | Q/G                        | Q/H       | Q/A        | Y/V         | Q/G         | Q/G         | Q/G         | Q/A         | Q/G         | Q/G         |
| V5/Vietnam/2022          | PP320362 (This study) | Q/G                        | Q/H       | Q/A        | Y/V         | Q/G         | Q/G         | Q/G         | Q/A         | Q/G         | Q/G         |
| V194/Vietnam/2022        | PP320369 (This study) | Q/G                        | Q/H       | Q/A        | Y/V         | Q/G         | Q/G         | Q/G         | Q/A         | Q/G         | Q/G         |
| V91/Vietnam/2022         | PP320364 (This study) | Q/G                        | Q/H       | Q/A        | Y/V         | Q/G         | Q/G         | Q/G         | Q/A         | Q/G         | Q/G         |
| V156/Vietnam/2022        | PP320365 (This study) | Q/G                        | Q/H       | Q/A        | Y/V         | Q/G         | Q/G         | Q/G         | Q/A         | Q/G         | Q/G         |
| V162/Vietnam/2022        | PP320366 (This study) | Q/G                        | Q/H       | Q/A        | Y/V         | Q/G         | Q/G         | Q/G         | Q/A         | Q/G         | Q/G         |
| V196/Vietnam/2022        | PP320370 (This study) | Q/G                        | Q/H       | Q/A        | Y/V         | Q/G         | Q/G         | Q/G         | Q/A         | Q/G         | Q/G         |
| F8/Thailand/2022         | PP320361 (This study) | Q/G                        | Q/H       | Q/A        | Y/V         | Q/G         | Q/G         | Q/G         | Q/A         | Q/G         | Q/G         |
| S76/Thailand/2021        | PP320359 (This study) | Q/G                        | Q/H       | Q/A        | Y/V         | Q/G         | Q/G         | Q/G         | Q/A         | Q/G         | Q/G         |
| S81/Thailand/2021        | PP320360 (This study) | Q/G                        | Q/H       | Q/A        | Y/V         | Q/G         | Q/G         | Q/G         | Q/A         | Q/G         | Q/G         |
| G50/Thailand/2021        | PP320358 (This study) | Q/G                        | Q/H       | Q/A        | Y/V         | Q/G         | Q/G         | Q/G         | Q/A         | Q/G         | Q/G         |
| DD2/Tanzania/2003        | KM068048.1            | Q/G                        | Q/H       | Q/A        | Y/V         | Q/G         | Q/G         | Q/G         | Q/A         | Q/G         | Q/G         |
| UK003/UK/2008            | KC161964.1            | Q/G                        | Q/H       | Q/A        | Y/V         | Q/G         | Q/G         | Q/G         | Q/A         | Q/G         | Q/G         |
| 82/Tanzania/2010         | KM068049.1            | Q/G                        | Q/H       | <b>Q/T</b> | Y/V         | Q/G         | Q/G         | Q/G         | Q/A         | Q/G         | Q/G         |
| B103/Tanzania/2010       | KM068051.1            | Q/G                        | Q/H       | <b>Q/T</b> | Y/V         | Q/G         | Q/G         | Q/G         | Q/A         | Q/G         | Q/G         |
| US-PC0082/USA/2010       | JN088541.1            | Q/G                        | Q/H       | Q/A        | Y/V         | Q/G         | Q/G         | Q/G         | Q/A         | Q/G         | Q/G         |
| 75/Tanzania/2011         | KM068050.1            | Q/G                        | Q/H       | Q/A        | Y/V         | Q/G         | Q/G         | Q/G         | Q/A         | Q/G         | Q/G         |
| 12D049/Korea/2012        | KF924623.1            | Q/G                        | Q/H       | Q/A        | Y/V         | Q/G         | Q/G         | Q/G         | Q/A         | Q/G         | Q/G         |
| CE9/Australia/2012       | MH052678.1            | Q/G                        | Q/H       | Q/A        | Y/V         | Q/G         | Q/G         | Q/G         | Q/A         | Q/G         | Q/G         |
| SMCD-59/China/2015       | MF062158.1            | Q/G                        | Q/H       | Q/A        | Y/V         | Q/G         | Q/G         | Q/G         | Q/A         | Q/G         | Q/G         |
| CaKoV-26/Brazil/2016     | MH747478.1            | Q/G                        | Q/H       | Q/A        | Y/V         | Q/G         | Q/G         | Q/G         | Q/A         | Q/G         | Q/G         |
| S272/16/Fox/Germany/2016 | MN337880.1            | Q/G                        | Q/H       | Q/A        | Y/V         | Q/G         | Q/G         | Q/G         | Q/A         | Q/G         | Q/G         |
| CU 53/Thailand/2016      | MK201776.1            | Q/G                        | Q/H       | Q/A        | Y/V         | Q/G         | Q/G         | Q/G         | Q/A         | Q/G         | Q/G         |
| CU 101/Thailand/2016     | MK201777.1            | Q/G                        | Q/H       | Q/A        | Y/V         | Q/G         | Q/G         | Q/G         | Q/A         | Q/G         | Q/G         |
| CU 249/Thailand/2017     | MK201778.1            | Q/G                        | Q/H       | Q/A        | Y/V         | Q/G         | Q/G         | Q/G         | Q/A         | Q/G         | Q/G         |
| CU 716/Thailand/2018     | MK201779.1            | Q/G                        | Q/H       | Q/A        | Y/V         | Q/G         | Q/G         | Q/G         | Q/A         | Q/G         | Q/G         |
| JX-MO1/China/2021        | OM451182.1            | Q/G                        | Q/H       | Q/A        | Y/V         | Q/G         | Q/G         | Q/G         | Q/A         | Q/G         | Q/G         |

**Supplementary Table 6** Genetic analysis VP1 gene of Vietnamese and Thai canine kobuvirus (CaKoV) compared with reference CaKoVs.

| Name of sequence         | Accession number      | Country   | Year | Position of amino acids |    |    |    |     |     |     |     |     |     |     |     |     |     |     |     |     |     |     |     |     |     |     |     |     |
|--------------------------|-----------------------|-----------|------|-------------------------|----|----|----|-----|-----|-----|-----|-----|-----|-----|-----|-----|-----|-----|-----|-----|-----|-----|-----|-----|-----|-----|-----|-----|
|                          |                       |           |      | 60                      | 65 | 67 | 69 | 150 | 151 | 153 | 201 | 204 | 205 | 210 | 213 | 228 | 229 | 230 | 231 | 232 | 233 | 234 | 235 | 236 | 237 | 238 | 239 | 240 |
| V25/Vietnam/2022         | PP320363 (This study) | Vietnam   | 2022 | Q                       | V  | D  | T  | P   | M   | D   | S   | Q   | Q   | Q   | T   | P   | R   | A   | P   | P   | P   | L   | P   | P   | L   | P   | T   | P   |
| V178/Vietnam/2022        | PP320367 (This study) | Vietnam   | 2022 | Q                       | V  | D  | T  | P   | M   | D   | S   | Q   | Q   | Q   | T   | P   | R   | A   | P   | P   | P   | L   | P   | P   | L   | P   | T   | P   |
| V180/Vietnam/2022        | PP320368 (This study) | Vietnam   | 2022 | Q                       | V  | D  | T  | P   | M   | D   | S   | Q   | Q   | Q   | T   | P   | R   | A   | P   | P   | P   | L   | P   | P   | L   | P   | T   | P   |
| V5/Vietnam/2022          | PP320362 (This study) | Vietnam   | 2022 | Q                       | V  | D  | T  | P   | M   | D   | S   | Q   | Q   | Q   | T   | P   | R   | A   | P   | P   | P   | L   | P   | P   | L   | P   | T   | P   |
| V194/Vietnam/2022        | PP320369 (This study) | Vietnam   | 2022 | Q                       | V  | D  | T  | P   | M   | D   | S   | Q   | Q   | Q   | T   | P   | R   | A   | P   | P   | P   | L   | P   | P   | L   | P   | T   | P   |
| V91/Vietnam/2022         | PP320364 (This study) | Vietnam   | 2022 | Q                       | V  | D  | T  | P   | M   | D   | S   | Q   | Q   | Q   | T   | P   | R   | A   | P   | P   | P   | L   | P   | P   | L   | P   | T   | P   |
| V156/Vietnam/2022        | PP320365 (This study) | Vietnam   | 2022 | Q                       | V  | D  | T  | P   | M   | D   | S   | Q   | Q   | Q   | T   | P   | R   | A   | P   | P   | P   | L   | P   | P   | L   | P   | T   | P   |
| V162/Vietnam/2022        | PP320366 (This study) | Vietnam   | 2022 | N                       | L  | N  | A  | S   | E   | N   | T   | V   | E   | S   | S   | P   | R   | A   | P   | P   | P   | L   | P   | P   | L   | P   | T   | P   |
| V196/Vietnam/2022        | PP320370 (This study) | Vietnam   | 2022 | N                       | L  | N  | A  | S   | E   | N   | T   | V   | E   | S   | S   | P   | R   | A   | P   | P   | P   | L   | P   | P   | L   | P   | T   | P   |
| F8/Thailand/2022         | PP320361 (This study) | Thailand  | 2022 | Q                       | V  | D  | T  | P   | M   | D   | S   | Q   | Q   | Q   | T   | P   | R   | A   | P   | P   | P   | L   | P   | P   | L   | P   | T   | P   |
| S76/Thailand/2021        | PP320359 (This study) | Thailand  | 2021 | Q                       | V  | D  | T  | P   | M   | D   | S   | Q   | Q   | Q   | T   | P   | R   | A   | P   | P   | P   | L   | P   | P   | L   | P   | T   | P   |
| S81/Thailand/2021        | PP320360 (This study) | Thailand  | 2021 | Q                       | V  | D  | T  | P   | M   | D   | S   | Q   | Q   | Q   | T   | P   | R   | A   | P   | P   | P   | L   | P   | P   | L   | P   | T   | P   |
| G50/Thailand/2021        | PP320358 (This study) | Thailand  | 2021 | Q                       | V  | D  | T  | P   | M   | D   | S   | Q   | Q   | Q   | T   | P   | R   | A   | P   | P   | P   | L   | P   | P   | L   | P   | T   | P   |
| DD2/Tanzania/2003        | KM068048.1            | Tanzania  | 2003 | N                       | L  | N  | A  | S   | E   | N   | T   | V   | E   | S   | S   | P   | R   | A   | P   | P   | P   | L   | P   | P   | L   | P   | T   | P   |
| UK003/UK/2008            | KC161964.1            | UK        | 2008 | N                       | L  | N  | T  | S   | E   | N   | T   | V   | E   | S   | S   | P   | R   | A   | P   | P   | P   | L   | P   | P   | L   | P   | T   | P   |
| AN211D/USA/2009          | JN387133.1            | USA       | 2009 | N                       | L  | N  | A  | S   | E   | N   | T   | V   | E   | S   | S   | P   | R   | A   | P   | P   | -   | L   | P   | P   | L   | P   | T   | P   |
| 82/Tanzania/2010         | KM068049.1            | Tanzania  | 2010 | N                       | L  | N  | A  | S   | E   | N   | T   | A   | E   | S   | S   | C   | P   | V   | P   | P   | P   | L   | P   | P   | L   | P   | T   | P   |
| B103/Tanzania/2010       | KM068051.1            | Tanzania  | 2010 | N                       | L  | N  | A  | S   | E   | N   | T   | A   | E   | S   | S   | P   | R   | A   | P   | P   | P   | L   | P   | P   | L   | P   | T   | P   |
| US-PC0082/USA/2010       | JN088541.1            | USA       | 2010 | N                       | L  | N  | T  | S   | E   | N   | T   | V   | E   | S   | S   | C   | P   | V   | P   | P   | P   | L   | P   | P   | L   | P   | T   | P   |
| 75/Tanzania/2011         | KM068050.1            | Tanzania  | 2011 | N                       | L  | N  | A  | S   | E   | N   | T   | A   | E   | S   | S   | C   | P   | V   | P   | P   | P   | L   | P   | P   | L   | P   | T   | P   |
| 12D049/Korea/2012        | KF924623.1            | Korea     | 2012 | N                       | L  | N  | T  | S   | E   | N   | T   | V   | E   | S   | S   | P   | R   | A   | P   | P   | P   | L   | P   | P   | L   | P   | T   | P   |
| CE9/Australia/2012       | MH052678.1            | Australia | 2012 | N                       | L  | N  | A  | S   | E   | N   | T   | V   | E   | S   | S   | P   | R   | A   | P   | P   | P   | L   | P   | P   | L   | P   | T   | P   |
| SMCD-59/China/2015       | MF062158.1            | China     | 2015 | Q                       | V  | D  | A  | P   | M   | D   | S   | Q   | Q   | Q   | T   | P   | R   | A   | P   | P   | P   | L   | P   | P   | L   | P   | T   | P   |
| CaKoV-26/Brazil/2016     | MH747478.1            | Brazil    | 2016 | N                       | L  | N  | A  | S   | E   | N   | T   | V   | E   | S   | S   | H   | G   | A   | P   | P   | P   | L   | P   | P   | L   | P   | T   | P   |
| S272/16/Fox/Germany/2016 | MN337880.1            | Germany   | 2016 | N                       | L  | N  | T  | S   | E   | N   | T   | V   | E   | S   | S   | P   | R   | A   | P   | P   | P   | L   | P   | P   | L   | P   | T   | P   |
| CU 53/Thailand/2016      | MK201776.1            | Thailand  | 2016 | Q                       | V  | D  | T  | P   | M   | D   | S   | Q   | Q   | Q   | T   | P   | R   | A   | P   | P   | P   | L   | P   | P   | L   | P   | T   | P   |
| CU 101/Thailand/2016     | MK201777.1            | Thailand  | 2016 | Q                       | V  | D  | T  | P   | M   | D   | S   | Q   | Q   | Q   | T   | P   | R   | A   | P   | P   | P   | L   | P   | P   | L   | P   | T   | P   |
| CU 249/Thailand/2017     | MK201778.1            | Thailand  | 2017 | Q                       | V  | D  | A  | P   | M   | D   | S   | Q   | Q   | Q   | T   | P   | R   | A   | P   | P   | P   | L   | P   | P   | L   | P   | T   | P   |
| CU 716/Thailand/2018     | MK201779.1            | Thailand  | 2018 | Q                       | V  | D  | T  | P   | M   | D   | S   | Q   | Q   | Q   | T   | P   | R   | A   | P   | P   | P   | L   | P   | P   | L   | P   | T   | P   |
| CaKoV AH-1/China/2019    | MN449341.1            | China     | 2019 | Q                       | V  | D  | T  | P   | M   | D   | S   | Q   | Q   | Q   | T   | P   | R   | A   | P   | P   | P   | L   | P   | P   | L   | P   | T   | P   |
| JX-MO1/China/2021        | OM451182.1            | China     | 2021 | Q                       | V  | N  | T  | P   | M   | D   | S   | Q   | Q   | Q   | T   | P   | R   | A   | P   | P   | P   | L   | P   | P   | L   | P   | T   | P   |

**Supplementary Table 7** Setting parameters of methods to predict continuous B-cell epitope of VP1 capsid gene of canine kobuvirus (CaKoV) from IEDB database.

| <b>Method</b>                             | <b>Average score</b> | <b>Maximum score</b> | <b>Minimum score</b> | <b>Threshold</b> |
|-------------------------------------------|----------------------|----------------------|----------------------|------------------|
| Kolaskar and Tongaonkar antigenicity      | 1.026                | 1.167                | 0.883                | 1.026            |
| Bepipred linear epitope prediction        | 0.474                | 0.642                | 0.279                | 0.5              |
| Parker hydrophilicity                     | 1.353                | 6.586                | -5.129               | 1.353            |
| Emini surface accessibility               | 1.000                | 4.488                | 0.107                | 1.000            |
| Chou and Fasman beta turn                 | 1.047                | 1.391                | 0.648                | 1.047            |
| Karplus and Schulz flexibility prediction | 1.005                | 1.105                | 0.897                | 1.005            |



**Supplementary Table 8** Information analysis of discontinuous B-cell epitope predicted from the VP1 capsid of Vietnamese and Thai canine kobuvirus (CaKoV) in this study.

| No. | Residues                                                                                                                                                                                                               | Number of residues | Score |
|-----|------------------------------------------------------------------------------------------------------------------------------------------------------------------------------------------------------------------------|--------------------|-------|
| 1   | A1, N2, S3, E4, D5, L6, N7, A8, P9, Q10, D11, T12, A13, N14, I15, E16, N17, G18, A19, S20, D21, N22, T23, P24, Q25, P26, R27, T28, T29, F30, E31, Y32                                                                  | 32                 | 0.848 |
| 2   | L234, P235, L237, E241, T242, N243, P244, E245, K246, S247, V248, A249, V250, V251, K252, Q253, G254, A255, H256, T257, S258, L259, G260, D261, V262, D263, P264, D265, D266, R267, V268, Y269, I270, V271, R272, D274 | 36                 | 0.685 |
| 3   | I109, S110, N111, P112, N113, G114, L115, P116, T117, S118, E146, T147, P148, I149, P150, M151, S152, D153, T154, T155, L156, S201, Y202, P203, Q204, T213                                                             | 26                 | 0.677 |
| 4   | S165, P166, L167, S168, A169, S173, Y174, G176, W177, E178, D179, W180, S181, G182, T183, N184, F185, G186, V187, L188, Q189, A190                                                                                     | 22                 | 0.64  |
| 5   | E34, N35, S36, L37, P38, P39, D40, S41                                                                                                                                                                                 | 8                  | 0.632 |
| 6   | P64, V65, P66, D67, G68, T69, P125, P126, G127, A128, T129, I130, P131, Q132, S133, P134, D135, Q137, T138, S140, N141, F142, M144, Q205, D206, V207, Q208, P209, Q210, P211, M212                                     | 31                 | 0.608 |

Supplementary Table 9 Nucleotide and deduced amino acid similarities of CaKoV

Supplementary Table 9a Nucleotide sequence similarities of the CaKoV complete coding sequences (CDSs)

| Sequences     | 1     | 2     | 3     | 4     | 5     | 6     | 7     | 8     | 9     | 10    | 11    | 12    | 13    | 14    | 15    | 16    | 17    | 18    | 19    | 20    | 21    | 22    | 23    | 24    | 25    | 26    | 27    | 28    | 29    | 30    | 31    | 32    | 33    |       |       |       |
|---------------|-------|-------|-------|-------|-------|-------|-------|-------|-------|-------|-------|-------|-------|-------|-------|-------|-------|-------|-------|-------|-------|-------|-------|-------|-------|-------|-------|-------|-------|-------|-------|-------|-------|-------|-------|-------|
| 1 PP320363    | ID    | 0.969 | 0.968 | 0.966 | 0.968 | 0.965 | 0.96  | 0.954 | 0.955 | 0.965 | 0.96  | 0.96  | 0.961 | 0.869 | 0.896 | 0.945 | 0.95  | 0.953 | 0.952 | 0.876 | 0.848 | 0.85  | 0.888 | 0.859 | 0.882 | 0.891 | 0.843 | 0.839 | 0.843 | 0.854 | 0.867 | 0.868 | 0.846 |       |       |       |
| 2 PP320367    | 0.969 | ID    | 0.973 | 0.973 | 0.965 | 0.964 | 0.959 | 0.954 | 0.953 | 0.965 | 0.96  | 0.96  | 0.961 | 0.867 | 0.891 | 0.945 | 0.948 | 0.95  | 0.952 | 0.877 | 0.847 | 0.848 | 0.886 | 0.86  | 0.881 | 0.889 | 0.841 | 0.836 | 0.84  | 0.855 | 0.867 | 0.866 | 0.841 |       |       |       |
| 3 PP320368    | 0.968 | 0.973 | ID    | 0.972 | 0.96  | 0.96  | 0.954 | 0.951 | 0.951 | 0.962 | 0.955 | 0.955 | 0.957 | 0.865 | 0.89  | 0.944 | 0.946 | 0.949 | 0.951 | 0.874 | 0.844 | 0.845 | 0.886 | 0.857 | 0.879 | 0.887 | 0.838 | 0.834 | 0.837 | 0.851 | 0.863 | 0.864 | 0.841 |       |       |       |
| 4 PP320362    | 0.966 | 0.973 | 0.972 | ID    | 0.961 | 0.962 | 0.954 | 0.949 | 0.95  | 0.962 | 0.957 | 0.957 | 0.959 | 0.864 | 0.887 | 0.941 | 0.945 | 0.947 | 0.948 | 0.873 | 0.843 | 0.845 | 0.884 | 0.856 | 0.878 | 0.885 | 0.839 | 0.836 | 0.839 | 0.851 | 0.863 | 0.861 | 0.841 |       |       |       |
| 5 PP320369    | 0.968 | 0.965 | 0.96  | 0.961 | ID    | 0.963 | 0.959 | 0.951 | 0.953 | 0.964 | 0.958 | 0.958 | 0.958 | 0.865 | 0.89  | 0.944 | 0.947 | 0.95  | 0.95  | 0.873 | 0.845 | 0.844 | 0.885 | 0.857 | 0.882 | 0.89  | 0.841 | 0.837 | 0.841 | 0.854 | 0.867 | 0.862 | 0.843 |       |       |       |
| 6 PP320364    | 0.965 | 0.964 | 0.96  | 0.962 | 0.963 | ID    | 0.959 | 0.952 | 0.952 | 0.962 | 0.955 | 0.955 | 0.958 | 0.863 | 0.89  | 0.943 | 0.945 | 0.947 | 0.947 | 0.875 | 0.843 | 0.844 | 0.884 | 0.856 | 0.88  | 0.887 | 0.839 | 0.835 | 0.839 | 0.852 | 0.863 | 0.863 | 0.842 |       |       |       |
| 7 PP320365    | 0.96  | 0.959 | 0.954 | 0.954 | 0.959 | 0.959 | ID    | 0.95  | 0.951 | 0.956 | 0.95  | 0.95  | 0.955 | 0.861 | 0.884 | 0.936 | 0.941 | 0.943 | 0.943 | 0.871 | 0.842 | 0.845 | 0.881 | 0.855 | 0.878 | 0.882 | 0.838 | 0.834 | 0.838 | 0.853 | 0.863 | 0.86  | 0.843 |       |       |       |
| 8 PP320366    | 0.954 | 0.954 | 0.951 | 0.949 | 0.951 | 0.952 | 0.95  | ID    | 0.963 | 0.95  | 0.946 | 0.946 | 0.949 | 0.857 | 0.879 | 0.932 | 0.939 | 0.94  | 0.939 | 0.876 | 0.849 | 0.848 | 0.873 | 0.859 | 0.882 | 0.881 | 0.84  | 0.837 | 0.841 | 0.854 | 0.865 | 0.865 | 0.845 |       |       |       |
| 9 PP320370    | 0.955 | 0.953 | 0.951 | 0.95  | 0.953 | 0.952 | 0.951 | 0.963 | ID    | 0.951 | 0.947 | 0.947 | 0.95  | 0.857 | 0.878 | 0.931 | 0.937 | 0.938 | 0.939 | 0.878 | 0.848 | 0.849 | 0.875 | 0.858 | 0.884 | 0.88  | 0.842 | 0.837 | 0.842 | 0.853 | 0.867 | 0.865 | 0.847 |       |       |       |
| 10 PP320361   | 0.965 | 0.965 | 0.962 | 0.962 | 0.964 | 0.962 | 0.956 | 0.95  | 0.951 | ID    | 0.965 | 0.965 | 0.963 | 0.864 | 0.889 | 0.946 | 0.949 | 0.951 | 0.952 | 0.875 | 0.845 | 0.846 | 0.886 | 0.859 | 0.881 | 0.887 | 0.84  | 0.837 | 0.841 | 0.854 | 0.865 | 0.863 | 0.841 |       |       |       |
| 11 PP320359   | 0.96  | 0.96  | 0.955 | 0.957 | 0.958 | 0.955 | 0.95  | 0.946 | 0.947 | 0.965 | ID    | 0.999 | 0.956 | 0.861 | 0.884 | 0.939 | 0.945 | 0.943 | 0.942 | 0.871 | 0.842 | 0.844 | 0.88  | 0.856 | 0.879 | 0.881 | 0.839 | 0.835 | 0.839 | 0.85  | 0.862 | 0.861 | 0.84  |       |       |       |
| 12 PP320360   | 0.96  | 0.96  | 0.955 | 0.957 | 0.958 | 0.955 | 0.95  | 0.946 | 0.947 | 0.965 | ID    | 0.999 | 0.956 | 0.861 | 0.884 | 0.939 | 0.945 | 0.943 | 0.942 | 0.871 | 0.842 | 0.844 | 0.88  | 0.856 | 0.879 | 0.881 | 0.839 | 0.835 | 0.839 | 0.85  | 0.862 | 0.861 | 0.84  |       |       |       |
| 13 PP320358   | 0.961 | 0.961 | 0.957 | 0.959 | 0.958 | 0.958 | 0.955 | 0.949 | 0.95  | 0.963 | 0.956 | 0.956 | ID    | 0.862 | 0.887 | 0.943 | 0.946 | 0.949 | 0.95  | 0.873 | 0.845 | 0.845 | 0.881 | 0.854 | 0.879 | 0.883 | 0.838 | 0.835 | 0.839 | 0.852 | 0.865 | 0.86  | 0.84  |       |       |       |
| 14 OM451182.1 | 0.869 | 0.867 | 0.865 | 0.864 | 0.865 | 0.863 | 0.861 | 0.857 | 0.857 | 0.864 | 0.861 | 0.861 | 0.862 | ID    | 0.934 | 0.878 | 0.881 | 0.884 | 0.884 | 0.899 | 0.921 | 0.92  | 0.93  | 0.932 | 0.903 | 0.925 | 0.913 | 0.909 | 0.914 | 0.928 | 0.906 | 0.914 | 0.914 |       |       |       |
| 15 MN449341.1 | 0.896 | 0.891 | 0.89  | 0.887 | 0.889 | 0.89  | 0.884 | 0.879 | 0.878 | 0.889 | 0.884 | 0.884 | 0.887 | 0.934 | ID    | 0.903 | 0.907 | 0.91  | 0.91  | 0.917 | 0.916 | 0.916 | 0.965 | 0.93  | 0.921 | 0.97  | 0.909 | 0.905 | 0.908 | 0.919 | 0.927 | 0.935 | 0.912 |       |       |       |
| 16 MK201779.1 | 0.945 | 0.945 | 0.944 | 0.941 | 0.944 | 0.943 | 0.936 | 0.932 | 0.931 | 0.946 | 0.939 | 0.939 | 0.943 | 0.878 | 0.903 | ID    | 0.97  | 0.965 | 0.964 | 0.872 | 0.857 | 0.86  | 0.898 | 0.868 | 0.893 | 0.901 | 0.851 | 0.846 | 0.85  | 0.864 | 0.879 | 0.877 | 0.853 |       |       |       |
| 17 MK201778.1 | 0.95  | 0.948 | 0.946 | 0.945 | 0.947 | 0.945 | 0.941 | 0.939 | 0.937 | 0.949 | 0.945 | 0.945 | 0.946 | 0.881 | 0.907 | 0.97  | ID    | 0.968 | 0.967 | 0.878 | 0.863 | 0.862 | 0.902 | 0.874 | 0.898 | 0.907 | 0.854 | 0.849 | 0.854 | 0.873 | 0.881 | 0.857 |       |       |       |       |
| 18 MK201776.1 | 0.953 | 0.95  | 0.949 | 0.947 | 0.95  | 0.947 | 0.943 | 0.94  | 0.938 | 0.951 | 0.943 | 0.943 | 0.949 | 0.884 | 0.91  | 0.965 | 0.968 | ID    | 0.992 | 0.88  | 0.861 | 0.862 | 0.908 | 0.874 | 0.896 | 0.908 | 0.854 | 0.851 | 0.855 | 0.869 | 0.882 | 0.879 | 0.857 |       |       |       |
| 19 MK201777.1 | 0.952 | 0.952 | 0.951 | 0.948 | 0.95  | 0.947 | 0.943 | 0.939 | 0.939 | 0.952 | 0.942 | 0.942 | 0.95  | 0.884 | 0.91  | 0.964 | 0.967 | 0.992 | ID    | 0.88  | 0.861 | 0.862 | 0.909 | 0.873 | 0.896 | 0.908 | 0.854 | 0.851 | 0.854 | 0.869 | 0.881 | 0.879 | 0.857 |       |       |       |
| 20 MT610361.1 | 0.876 | 0.877 | 0.874 | 0.873 | 0.873 | 0.875 | 0.871 | 0.876 | 0.878 | 0.875 | 0.871 | 0.871 | 0.873 | 0.899 | 0.917 | 0.872 | 0.878 | 0.88  | 0.88  | ID    | 0.896 | 0.892 | 0.913 | 0.906 | 0.906 | 0.924 | 0.885 | 0.882 | 0.886 | 0.9   | 0.9   | 0.911 | 0.89  |       |       |       |
| 21 MH747478.1 | 0.848 | 0.847 | 0.844 | 0.843 | 0.845 | 0.843 | 0.842 | 0.849 | 0.848 | 0.845 | 0.842 | 0.842 | 0.845 | 0.921 | 0.916 | 0.857 | 0.863 | 0.861 | 0.861 | 0.896 | ID    | 0.934 | 0.912 | 0.933 | 0.902 | 0.922 | 0.93  | 0.925 | 0.929 | 0.931 | 0.914 | 0.927 | 0.93  |       |       |       |
| 22 MN337880.1 | 0.85  | 0.848 | 0.845 | 0.845 | 0.844 | 0.844 | 0.845 | 0.848 | 0.849 | 0.846 | 0.844 | 0.844 | 0.845 | 0.92  | 0.916 | 0.86  | 0.862 | 0.862 | 0.862 | 0.892 | 0.934 | ID    | 0.911 | 0.928 | 0.901 | 0.918 | 0.926 | 0.924 | 0.926 | 0.929 | 0.912 | 0.936 | 0.936 |       |       |       |
| 23 MF062158.1 | 0.888 | 0.886 | 0.886 | 0.884 | 0.885 | 0.884 | 0.881 | 0.873 | 0.875 | 0.886 | 0.888 | 0.888 | 0.881 | 0.93  | 0.884 | 0.865 | 0.898 | 0.902 | 0.908 | 0.909 | 0.913 | 0.912 | 0.911 | ID    | 0.928 | 0.918 | 0.964 | 0.904 | 0.901 | 0.904 | 0.914 | 0.923 | 0.928 | 0.906 |       |       |
| 24 KF924623.1 | 0.859 | 0.86  | 0.857 | 0.856 | 0.857 | 0.856 | 0.855 | 0.859 | 0.858 | 0.859 | 0.856 | 0.856 | 0.854 | 0.932 | 0.93  | 0.868 | 0.874 | 0.874 | 0.873 | 0.906 | 0.933 | 0.928 | 0.928 | ID    | 0.913 | 0.935 | 0.92  | 0.917 | 0.922 | 0.933 | 0.917 | 0.926 | 0.926 |       |       |       |
| 25 MH052678.1 | 0.882 | 0.881 | 0.879 | 0.878 | 0.882 | 0.88  | 0.875 | 0.882 | 0.884 | 0.881 | 0.879 | 0.879 | 0.879 | 0.933 | 0.921 | 0.893 | 0.898 | 0.884 | 0.86  | 0.896 | 0.902 | 0.901 | 0.918 | 0.913 | ID    | 0.926 | 0.896 | 0.891 | 0.927 | 0.919 | 0.929 | 0.92  | 0.898 |       |       |       |
| 26 JQ911763.1 | 0.891 | 0.889 | 0.887 | 0.885 | 0.89  | 0.887 | 0.882 | 0.881 | 0.88  | 0.887 | 0.881 | 0.881 | 0.883 | 0.935 | 0.97  | 0.901 | 0.907 | 0.908 | 0.908 | 0.924 | 0.922 | 0.918 | 0.964 | 0.935 | 0.926 | ID    | 0.915 | 0.912 | 0.914 | 0.924 | 0.932 | 0.938 | 0.917 |       |       |       |
| 27 KM068050.1 | 0.843 | 0.841 | 0.838 | 0.839 | 0.841 | 0.839 | 0.838 | 0.84  | 0.842 | 0.84  | 0.84  | 0.84  | 0.839 | 0.839 | 0.838 | 0.913 | 0.909 | 0.851 | 0.854 | 0.854 | 0.854 | 0.885 | 0.93  | 0.926 | 0.904 | 0.909 | 0.92  | 0.896 | 0.915 | ID    | 0.977 | 0.981 | 0.921 | 0.907 | 0.923 | 0.937 |
| 28 KM068049.1 | 0.839 | 0.836 | 0.834 | 0.836 | 0.837 | 0.835 | 0.834 | 0.837 | 0.837 | 0.837 | 0.835 | 0.835 | 0.835 | 0.909 | 0.905 | 0.846 | 0.849 | 0.851 | 0.851 | 0.882 | 0.925 | 0.924 | 0.901 | 0.917 | 0.891 | 0.912 | 0.977 | ID    | 0.974 | 0.918 | 0.904 | 0.919 | 0.946 |       |       |       |
| 29 KM068051.1 | 0.843 | 0.841 | 0.837 | 0.839 | 0.841 | 0.839 | 0.838 | 0.841 | 0.842 | 0.841 | 0.839 | 0.839 | 0.839 | 0.914 | 0.908 | 0.85  | 0.854 | 0.855 | 0.854 | 0.886 | 0.929 | 0.926 | 0.904 | 0.902 | 0.897 | 0.914 | 0.981 | 0.974 | ID    | 0.922 | 0.907 | 0.924 | 0.939 |       |       |       |
| 30 JN088541.1 | 0.854 | 0.855 | 0.851 | 0.851 | 0.854 | 0.852 | 0.853 | 0.854 | 0.853 | 0.854 | 0.85  | 0.85  | 0.852 | 0.928 | 0.919 | 0.864 | 0.87  | 0.869 | 0.869 | 0.9   | 0.931 | 0.929 | 0.914 | 0.933 | 0.919 | 0.924 | 0.921 | 0.918 | 0.922 | ID    | 0.941 | 0.926 | 0.926 |       |       |       |
| 31 JN387133.1 | 0.867 | 0.867 | 0.863 | 0.863 | 0.864 | 0.863 | 0.863 | 0.865 | 0.867 | 0.865 | 0.862 | 0.862 | 0.865 | 0.862 | 0.863 | 0.879 | 0.883 | 0.882 | 0.881 | 0.9   | 0.914 | 0.912 | 0.923 | 0.917 | 0.929 | 0.932 | 0.907 | 0.904 | 0.907 | 0.941 | ID    | 0.932 | 0.911 |       |       |       |
| 32 KC161964.1 | 0.868 | 0.866 | 0.864 | 0.861 | 0.862 | 0.863 | 0.86  | 0.865 | 0.865 | 0.865 | 0.863 | 0.861 | 0.861 | 0.86  | 0.914 | 0.935 | 0.877 | 0.881 | 0.879 | 0.879 | 0.911 | 0.927 | 0.936 | 0.928 | 0.926 | 0.92  | 0.938 | 0.923 | 0.919 | 0.924 | 0.926 | 0.932 | ID    | 0.928 |       |       |
| 33 KM068048.1 | 0.846 | 0.841 | 0.841 | 0.841 | 0.843 | 0.842 | 0.843 | 0.845 | 0.847 | 0.841 | 0.84  | 0.84  | 0.84  | 0.84  | 0.914 | 0.912 | 0.853 | 0.857 | 0.857 | 0.857 | 0.857 | 0.857 | 0.936 | 0.906 | 0.926 | 0.898 | 0.917 | 0.937 | 0.946 | 0.939 | 0.926 | 0.911 | 0.928 | ID    |       |       |

60

61 Supplementary Table 9b Deduced amino acid sequence similarities of the CaKoV complete coding sequences (CDSs)

| Sequences  | 1  | 2    | 3     | 4     | 5     | 6     | 7     | 8     | 9     | 10   | 11    | 12    | 13    | 14   | 15    | 16    | 17    | 18   | 19    | 20    | 21    | 22    | 23    | 24    | 25    | 26   | 27    | 28    | 29    | 30    | 31    | 32    | 33    |
|------------|----|------|-------|-------|-------|-------|-------|-------|-------|------|-------|-------|-------|------|-------|-------|-------|------|-------|-------|-------|-------|-------|-------|-------|------|-------|-------|-------|-------|-------|-------|-------|
| 1 PP320363 | ID | 0.95 | 0.946 | 0.949 | 0.956 | 0.955 | 0.941 | 0.926 | 0.929 | 0.95 | 0.942 | 0.941 | 0.943 | 0.85 | 0.891 | 0.929 | 0.939 | 0.94 | 0.939 | 0.845 | 0.817 | 0.822 | 0.874 | 0.826 | 0.839 | 0.88 | 0.811 | 0.807 | 0.812 | 0.823 | 0.835 | 0.843 | 0.819 |
| 2 PP320367 |    |      |       |       |       |       |       |       |       |      |       |       |       |      |       |       |       |      |       |       |       |       |       |       |       |      |       |       |       |       |       |       |       |

### Supplementary Table 9c Nucleotide sequence similarities of the CaKoV P1 region

| Sequences      | 1     | 2     | 3     | 4     | 5     | 6     | 7     | 8     | 9     | 10    | 11    | 12    | 13    | 14    | 15    | 16    | 17     | 18    | 19    | 20    | 21    | 22    | 23    | 24    | 25    | 26    | 27    | 28    | 29    | 30    | 31    | 32    | 33    |       |
|----------------|-------|-------|-------|-------|-------|-------|-------|-------|-------|-------|-------|-------|-------|-------|-------|-------|--------|-------|-------|-------|-------|-------|-------|-------|-------|-------|-------|-------|-------|-------|-------|-------|-------|-------|
| 1 PP320363     | ID    | 0.96  | 0.959 | 0.956 | 0.964 | 0.961 | 0.94  | 0.932 | 0.931 | 0.957 | 0.952 | 0.952 | 0.951 | 0.934 | 0.968 | 0.954 | 0.959  | 0.961 | 0.961 | 0.913 | 0.894 | 0.904 | 0.953 | 0.909 | 0.901 | 0.951 | 0.895 | 0.892 | 0.895 | 0.9   | 0.902 | 0.915 | 0.899 |       |
| 2 PP320367     | 0.96  | ID    | 0.966 | 0.967 | 0.951 | 0.953 | 0.937 | 0.929 | 0.929 | 0.952 | 0.946 | 0.946 | 0.949 | 0.928 | 0.955 | 0.95  | 0.948  | 0.954 | 0.955 | 0.909 | 0.89  | 0.901 | 0.946 | 0.909 | 0.898 | 0.941 | 0.89  | 0.889 | 0.89  | 0.904 | 0.906 | 0.912 | 0.891 |       |
| 3 PP320368     | 0.959 | 0.966 | ID    | 0.967 | 0.947 | 0.948 | 0.935 | 0.929 | 0.928 | 0.952 | 0.946 | 0.945 | 0.95  | 0.931 | 0.963 | 0.951 | 0.951  | 0.961 | 0.963 | 0.906 | 0.888 | 0.896 | 0.954 | 0.906 | 0.899 | 0.943 | 0.886 | 0.884 | 0.886 | 0.901 | 0.898 | 0.91  | 0.892 |       |
| 4 PP320362     | 0.956 | 0.967 | 0.967 | ID    | 0.948 | 0.952 | 0.933 | 0.926 | 0.927 | 0.952 | 0.946 | 0.946 | 0.951 | 0.929 | 0.956 | 0.948 | 0.948  | 0.955 | 0.956 | 0.906 | 0.89  | 0.899 | 0.947 | 0.904 | 0.901 | 0.938 | 0.887 | 0.887 | 0.888 | 0.9   | 0.9   | 0.907 | 0.89  |       |
| 5 PP320369     | 0.964 | 0.951 | 0.947 | 0.948 | ID    | 0.956 | 0.932 | 0.924 | 0.929 | 0.949 | 0.945 | 0.946 | 0.946 | 0.925 | 0.956 | 0.948 | 0.953  | 0.95  | 0.952 | 0.906 | 0.886 | 0.884 | 0.945 | 0.905 | 0.902 | 0.941 | 0.887 | 0.888 | 0.885 | 0.898 | 0.901 | 0.903 | 0.893 |       |
| 6 PP320364     | 0.961 | 0.953 | 0.948 | 0.952 | 0.956 | ID    | 0.94  | 0.929 | 0.932 | 0.95  | 0.943 | 0.943 | 0.948 | 0.924 | 0.96  | 0.951 | 0.947  | 0.951 | 0.952 | 0.907 | 0.884 | 0.895 | 0.947 | 0.906 | 0.899 | 0.942 | 0.89  | 0.887 | 0.891 | 0.899 | 0.899 | 0.909 | 0.895 |       |
| 7 PP320365     | 0.94  | 0.937 | 0.935 | 0.933 | 0.932 | 0.94  | ID    | 0.924 | 0.922 | 0.932 | 0.923 | 0.928 | 0.918 | 0.938 | 0.933 | 0.934 | 0.9237 | 0.938 | 0.902 | 0.881 | 0.899 | 0.932 | 0.901 | 0.894 | 0.925 | 0.887 | 0.884 | 0.886 | 0.899 | 0.897 | 0.904 | 0.897 |       |       |
| 8 PP320366     | 0.932 | 0.929 | 0.929 | 0.926 | 0.924 | 0.929 | 0.924 | ID    | 0.97  | 0.923 | 0.925 | 0.924 | 0.925 | 0.91  | 0.931 | 0.926 | 0.93   | 0.932 | 0.932 | 0.92  | 0.906 | 0.917 | 0.921 | 0.921 | 0.914 | 0.929 | 0.901 | 0.898 | 0.901 | 0.907 | 0.909 | 0.921 | 0.912 |       |
| 9 PP320370     | 0.931 | 0.929 | 0.928 | 0.927 | 0.929 | 0.932 | 0.922 | 0.97  | ID    | 0.924 | 0.923 | 0.923 | 0.928 | 0.906 | 0.932 | 0.924 | 0.931  | 0.931 | 0.932 | 0.922 | 0.903 | 0.918 | 0.922 | 0.916 | 0.914 | 0.929 | 0.901 | 0.936 | 0.9   | 0.906 | 0.907 | 0.923 | 0.913 |       |
| 10 PP320361    | 0.957 | 0.952 | 0.952 | 0.952 | 0.949 | 0.95  | 0.932 | 0.923 | 0.924 | ID    | 0.951 | 0.951 | 0.951 | 0.927 | 0.955 | 0.951 | 0.954  | 0.959 | 0.958 | 0.907 | 0.883 | 0.896 | 0.95  | 0.907 | 0.901 | 0.937 | 0.889 | 0.888 | 0.889 | 0.899 | 0.9   | 0.906 | 0.889 |       |
| 11 PP320359    | 0.952 | 0.946 | 0.946 | 0.946 | 0.945 | 0.943 | 0.925 | 0.925 | 0.923 | 0.951 | ID    | 0.999 | 0.941 | 0.924 | 0.949 | 0.943 | 0.952  | 0.948 | 0.957 | 0.906 | 0.884 | 0.895 | 0.942 | 0.907 | 0.899 | 0.931 | 0.888 | 0.887 | 0.887 | 0.894 | 0.896 | 0.904 | 0.89  |       |
| 12 PP320360    | 0.952 | 0.946 | 0.945 | 0.946 | 0.945 | 0.943 | 0.924 | 0.924 | 0.923 | 0.951 | 0.999 | ID    | 0.941 | 0.924 | 0.949 | 0.943 | 0.952  | 0.948 | 0.946 | 0.906 | 0.884 | 0.895 | 0.942 | 0.906 | 0.898 | 0.931 | 0.888 | 0.886 | 0.887 | 0.894 | 0.895 | 0.903 | 0.89  |       |
| 13 PP320358    | 0.951 | 0.949 | 0.95  | 0.951 | 0.946 | 0.948 | 0.938 | 0.925 | 0.928 | 0.951 | 0.941 | 0.941 | ID    | 0.926 | 0.956 | 0.953 | 0.953  | 0.956 | 0.959 | 0.909 | 0.886 | 0.901 | 0.949 | 0.905 | 0.901 | 0.935 | 0.889 | 0.887 | 0.89  | 0.901 | 0.903 | 0.907 | 0.895 |       |
| 14 OM451182.1  | 0.934 | 0.928 | 0.931 | 0.929 | 0.925 | 0.924 | 0.918 | 0.91  | 0.906 | 0.927 | 0.924 | 0.924 | 0.926 | ID    | 0.93  | 0.929 | 0.929  | 0.935 | 0.933 | 0.903 | 0.882 | 0.893 | 0.927 | 0.899 | 0.886 | 0.926 | 0.879 | 0.88  | 0.882 | 0.892 | 0.887 | 0.896 | 0.887 |       |
| 15 MN449341.1  | 0.955 | 0.963 | 0.956 | 0.956 | 0.96  | 0.938 | 0.931 | 0.932 | 0.955 | 0.949 | 0.949 | 0.956 | 0.93  | ID    | 0.954 | 0.955 | 0.956  | 0.966 | 0.966 | 0.914 | 0.89  | 0.899 | 0.959 | 0.896 | 0.892 | 0.954 | 0.981 | 0.891 | 0.882 | 0.901 | 0.889 | 0.913 | 0.896 |       |
| 16 MK201779.1  | 0.954 | 0.95  | 0.951 | 0.948 | 0.948 | 0.951 | 0.933 | 0.926 | 0.924 | 0.951 | 0.943 | 0.943 | 0.953 | 0.929 | 0.954 | ID    | 0.957  | 0.956 | 0.955 | 0.904 | 0.886 | 0.901 | 0.949 | 0.903 | 0.899 | 0.943 | 0.885 | 0.884 | 0.884 | 0.898 | 0.899 | 0.905 | 0.891 |       |
| 17 MK201778.1  | 0.959 | 0.948 | 0.95  | 0.948 | 0.953 | 0.947 | 0.934 | 0.93  | 0.931 | 0.954 | 0.952 | 0.953 | 0.929 | 0.955 | 0.957 | ID    | 0.958  | 0.958 | 0.911 | 0.894 | 0.9   | 0.952 | 0.912 | 0.907 | 0.948 | 0.888 | 0.886 | 0.886 | 0.886 | 0.903 | 0.904 | 0.91  | 0.893 |       |
| 18 MK201777.1  | 0.961 | 0.954 | 0.961 | 0.955 | 0.95  | 0.951 | 0.937 | 0.932 | 0.931 | 0.959 | 0.948 | 0.948 | 0.956 | 0.935 | 0.966 | 0.956 | 0.958  | ID    | 0.995 | 0.915 | 0.887 | 0.902 | 0.969 | 0.909 | 0.901 | 0.951 | 0.889 | 0.89  | 0.891 | 0.903 | 0.9   | 0.909 | 0.896 |       |
| 19 MK201776.1  | 0.961 | 0.955 | 0.963 | 0.956 | 0.952 | 0.952 | 0.938 | 0.932 | 0.932 | 0.958 | 0.947 | 0.946 | 0.959 | 0.933 | 0.966 | 0.955 | 0.958  | 0.995 | ID    | 0.914 | 0.886 | 0.902 | 0.969 | 0.907 | 0.902 | 0.951 | 0.89  | 0.891 | 0.891 | 0.903 | 0.9   | 0.91  | 0.896 |       |
| 20 MT610361.1  | 0.913 | 0.909 | 0.906 | 0.906 | 0.906 | 0.907 | 0.902 | 0.92  | 0.922 | 0.907 | 0.906 | 0.906 | 0.909 | 0.903 | 0.914 | 0.904 | 0.91   | 0.915 | 0.914 | ID    | 0.907 | 0.912 | 0.906 | 0.927 | 0.912 | 0.92  | 0.899 | 0.898 | 0.902 | 0.917 | 0.91  | 0.923 | 0.908 |       |
| 21 MH747478.1  | 0.894 | 0.89  | 0.888 | 0.89  | 0.886 | 0.884 | 0.881 | 0.906 | 0.886 | 0.903 | 0.883 | 0.884 | 0.886 | 0.882 | 0.889 | 0.886 | 0.894  | 0.887 | 0.886 | 0.907 | ID    | 0.909 | 0.882 | 0.905 | 0.899 | 0.896 | 0.895 | 0.898 | 0.901 | 0.9   | 0.915 | 0.901 |       |       |
| 22 MN337880.1  | 0.904 | 0.901 | 0.896 | 0.899 | 0.894 | 0.895 | 0.899 | 0.917 | 0.918 | 0.896 | 0.895 | 0.895 | 0.901 | 0.893 | 0.899 | 0.901 | 0.9    | 0.902 | 0.902 | 0.912 | 0.909 | ID    | 0.893 | 0.908 | 0.901 | 0.903 | 0.904 | 0.909 | 0.907 | 0.904 | 0.903 | 0.939 | 0.924 |       |
| 23 MF062158.1  | 0.953 | 0.946 | 0.954 | 0.947 | 0.945 | 0.947 | 0.932 | 0.921 | 0.922 | 0.95  | 0.942 | 0.942 | 0.949 | 0.927 | 0.959 | 0.949 | 0.952  | 0.969 | 0.969 | 0.906 | 0.882 | 0.893 | ID    | 0.902 | 0.899 | 0.947 | 0.885 | 0.885 | 0.887 | 0.894 | 0.894 | 0.902 | 0.888 |       |
| 24 KF924623.1  | 0.909 | 0.909 | 0.906 | 0.904 | 0.905 | 0.906 | 0.901 | 0.921 | 0.916 | 0.907 | 0.907 | 0.906 | 0.905 | 0.899 | 0.906 | 0.903 | 0.912  | 0.909 | 0.969 | 0.907 | 0.927 | 0.905 | 0.908 | 0.902 | ID    | 0.899 | 0.911 | 0.897 | 0.898 | 0.901 | 0.921 | 0.92  | 0.926 | 0.912 |
| 25 MH052678.1  | 0.901 | 0.898 | 0.899 | 0.901 | 0.902 | 0.899 | 0.894 | 0.914 | 0.914 | 0.901 | 0.899 | 0.898 | 0.901 | 0.886 | 0.902 | 0.899 | 0.907  | 0.901 | 0.902 | 0.912 | 0.899 | 0.901 | 0.899 | 0.919 | ID    | 0.905 | 0.895 | 0.893 | 0.896 | 0.937 | 0.933 | 0.916 | 0.903 |       |
| 26 JQ911763.1  | 0.951 | 0.941 | 0.943 | 0.938 | 0.941 | 0.942 | 0.925 | 0.929 | 0.929 | 0.937 | 0.931 | 0.931 | 0.935 | 0.926 | 0.954 | 0.943 | 0.948  | 0.951 | 0.951 | 0.92  | 0.896 | 0.903 | 0.947 | 0.911 | 0.905 | ID    | 0.899 | 0.899 | 0.895 | 0.908 | 0.904 | 0.912 | 0.902 |       |
| 27 KM1068050.1 | 0.895 | 0.89  | 0.886 | 0.887 | 0.887 | 0.89  | 0.887 | 0.901 | 0.901 | 0.889 | 0.888 | 0.888 | 0.888 | 0.889 | 0.879 | 0.891 | 0.885  | 0.888 | 0.889 | 0.89  | 0.899 | 0.896 | 0.904 | 0.885 | 0.897 | 0.895 | 0.899 | ID    | 0.972 | 0.975 | 0.89  | 0.895 | 0.914 | 0.916 |
| 28 KM1068049.1 | 0.892 | 0.889 | 0.884 | 0.887 | 0.888 | 0.887 | 0.884 | 0.898 | 0.896 | 0.888 | 0.887 | 0.886 | 0.887 | 0.888 | 0.891 | 0.885 | 0.886  | 0.89  | 0.891 | 0.898 | 0.895 | 0.909 | 0.885 | 0.898 | 0.893 | 0.899 | 0.972 | ID    | 0.973 | 0.899 | 0.896 | 0.915 | 0.93  |       |
| 29 KM1068051.1 | 0.895 | 0.89  | 0.886 | 0.888 | 0.885 | 0.891 | 0.886 | 0.901 | 0.9   | 0.889 | 0.887 | 0.887 | 0.89  | 0.882 | 0.892 | 0.884 | 0.886  | 0.891 | 0.891 | 0.902 | 0.898 | 0.907 | 0.887 | 0.901 | 0.896 | 0.895 | 0.975 | 0.973 | ID    | 0.89  | 0.896 | 0.919 | 0.924 |       |
| 30 JN088541.1  | 0.9   | 0.904 | 0.901 | 0.9   | 0.898 | 0.899 | 0.899 | 0.907 | 0.906 | 0.899 | 0.894 | 0.894 | 0.901 | 0.892 | 0.901 | 0.898 | 0.903  | 0.903 | 0.903 | 0.917 | 0.901 | 0.904 | 0.894 | 0.921 | 0.937 | 0.908 | 0.89  | 0.899 | ID    | 0.953 | 0.917 | 0.902 |       |       |
| 31 JN387133.1  | 0.902 | 0.906 | 0.898 | 0.9   | 0.901 | 0.899 | 0.897 | 0.909 | 0.907 | 0.9   | 0.896 | 0.895 | 0.903 | 0.887 | 0.899 | 0.899 | 0.904  | 0.9   | 0.9   | 0.91  | 0.9   | 0.903 | 0.894 | 0.92  | 0.933 | 0.904 | 0.895 | 0.896 | 0.896 | 0.953 | ID    | 0.918 | 0.902 |       |
| 32 KC161964.1  | 0.915 | 0.912 | 0.91  | 0.907 | 0.903 | 0.909 | 0.904 | 0.921 | 0.923 | 0.906 | 0.904 | 0.903 | 0.907 | 0.896 | 0.913 | 0.905 | 0.921  | 0.909 | 0.91  | 0.923 | 0.915 | 0.939 | 0.902 | 0.926 | 0.916 | 0.912 | 0.9   |       |       |       |       |       |       |       |

### Supplementary Table 9e Nucleotide sequence similarities of the CaKoV P2 region

| Sequences      | 1     | 2     | 3     | 4     | 5     | 6     | 7     | 8     | 9     | 10    | 11    | 12    | 13    | 14    | 15    | 16    | 17    | 18    | 19    | 20    | 21    | 22    | 23    | 24    | 25    | 26    | 27    | 28    | 29    | 30    | 31    | 32    | 33    |       |
|----------------|-------|-------|-------|-------|-------|-------|-------|-------|-------|-------|-------|-------|-------|-------|-------|-------|-------|-------|-------|-------|-------|-------|-------|-------|-------|-------|-------|-------|-------|-------|-------|-------|-------|-------|
| 1 PP320363     | ID    | 0.977 | 0.973 | 0.973 | 0.967 | 0.967 | 0.967 | 0.968 | 0.962 | 0.973 | 0.968 | 0.968 | 0.971 | 0.967 | 0.977 | 0.959 | 0.967 | 0.973 | 0.974 | 0.961 | 0.955 | 0.949 | 0.973 | 0.965 | 0.965 | 0.973 | 0.944 | 0.938 | 0.943 | 0.956 | 0.953 | 0.955 | 0.938 |       |
| 2 PP320367     | ID    | 0.985 | 0.985 | 0.968 | 0.973 | 0.968 | 0.971 | 0.965 | 0.978 | 0.971 | 0.971 | 0.969 | 0.967 | 0.974 | 0.961 | 0.974 | 0.971 | 0.977 | 0.963 | 0.956 | 0.945 | 0.977 | 0.97  | 0.967 | 0.975 | 0.944 | 0.936 | 0.941 | 0.957 | 0.954 | 0.951 | 0.937 |       |       |
| 3 PP320368     | ID    | 0.978 | 0.963 | 0.968 | 0.962 | 0.961 | 0.959 | 0.972 | 0.965 | 0.965 | 0.966 | 0.959 | 0.967 | 0.959 | 0.965 | 0.968 | 0.971 | 0.957 | 0.95  | 0.945 | 0.969 | 0.966 | 0.96  | 0.971 | 0.943 | 0.932 | 0.938 | 0.95  | 0.951 | 0.949 | 0.934 |       |       |       |
| 4 PP320362     | ID    | 0.978 | ID    | 0.964 | 0.964 | 0.969 | 0.962 | 0.964 | 0.961 | 0.972 | 0.967 | 0.967 | 0.969 | 0.961 | 0.967 | 0.958 | 0.966 | 0.967 | 0.971 | 0.958 | 0.952 | 0.944 | 0.97  | 0.963 | 0.959 | 0.969 | 0.939 | 0.932 | 0.937 | 0.953 | 0.951 | 0.948 | 0.934 |       |
| 5 PP320369     | ID    | 0.964 | ID    | 0.964 | 0.964 | 0.974 | 0.963 | 0.965 | 0.975 | 0.966 | 0.966 | 0.973 | 0.957 | 0.971 | 0.956 | 0.965 | 0.971 | 0.972 | 0.954 | 0.951 | 0.939 | 0.965 | 0.959 | 0.962 | 0.973 | 0.943 | 0.935 | 0.942 | 0.957 | 0.955 | 0.947 | 0.936 |       |       |
| 6 PP320364     | ID    | 0.968 | ID    | 0.962 | 0.963 | 0.961 | 0.972 | 0.963 | 0.963 | 0.966 | 0.959 | 0.967 | 0.955 | 0.963 | 0.967 | 0.97  | 0.958 | 0.95  | 0.944 | 0.967 | 0.963 | 0.961 | 0.97  | 0.943 | 0.939 | 0.942 | 0.956 | 0.952 | 0.951 | 0.951 | 0.938 |       |       |       |
| 7 PP320365     | ID    | 0.962 | 0.974 | 0.962 | 0.974 | 0.962 | ID    | 0.966 | 0.963 | 0.962 | 0.962 | 0.962 | 0.968 | 0.957 | 0.973 | 0.956 | 0.966 | 0.967 | 0.969 | 0.97  | 0.955 | 0.947 | 0.938 | 0.969 | 0.958 | 0.958 | 0.969 | 0.938 | 0.931 | 0.937 | 0.955 | 0.953 | 0.945 | 0.935 |
| 8 PP320366     | ID    | 0.961 | 0.963 | 0.963 | 0.963 | 0.966 | ID    | 0.956 | 0.969 | 0.962 | 0.962 | 0.967 | 0.961 | 0.973 | 0.953 | 0.966 | 0.971 | 0.972 | 0.955 | 0.949 | 0.938 | 0.964 | 0.963 | 0.962 | 0.966 | 0.939 | 0.933 | 0.939 | 0.954 | 0.95  | 0.945 | 0.932 |       |       |
| 9 PP320370     | ID    | 0.965 | 0.959 | 0.961 | 0.965 | 0.961 | 0.963 | 0.956 | ID    | 0.969 | 0.959 | 0.962 | 0.963 | 0.954 | 0.962 | 0.952 | 0.966 | 0.959 | 0.962 | 0.951 | 0.948 | 0.937 | 0.963 | 0.968 | 0.958 | 0.956 | 0.962 | 0.936 | 0.93  | 0.934 | 0.95  | 0.951 | 0.944 | 0.931 |
| 10 PP320361    | ID    | 0.978 | 0.972 | 0.972 | 0.975 | 0.972 | 0.972 | 0.969 | 0.969 | ID    | 0.971 | 0.971 | 0.976 | 0.965 | 0.978 | 0.965 | 0.974 | 0.976 | 0.983 | 0.962 | 0.957 | 0.947 | 0.977 | 0.971 | 0.965 | 0.977 | 0.942 | 0.937 | 0.942 | 0.959 | 0.956 | 0.95  | 0.937 |       |
| 11 PP320359    | ID    | 0.965 | 0.967 | 0.966 | 0.963 | 0.962 | 0.962 | 0.959 | 0.971 | ID    | 1     | 0.965 | 0.958 | 0.966 | 0.957 | 0.963 | 0.965 | 0.965 | 0.959 | 0.95  | 0.944 | 0.963 | 0.96  | 0.959 | 0.966 | 0.942 | 0.936 | 0.942 | 0.953 | 0.951 | 0.952 | 0.935 |       |       |
| 12 PP320360    | ID    | 0.965 | 0.967 | 0.966 | 0.963 | 0.962 | 0.962 | 0.959 | 0.971 | ID    | 1     | 0.965 | 0.958 | 0.966 | 0.957 | 0.963 | 0.965 | 0.965 | 0.959 | 0.95  | 0.944 | 0.963 | 0.96  | 0.959 | 0.966 | 0.942 | 0.936 | 0.942 | 0.953 | 0.951 | 0.952 | 0.935 |       |       |
| 13 PP320358    | ID    | 0.969 | 0.966 | 0.969 | 0.973 | 0.966 | 0.968 | 0.967 | 0.963 | 0.976 | 0.965 | 0.965 | ID    | 0.96  | 0.971 | 0.963 | 0.965 | 0.965 | 0.975 | 0.978 | 0.955 | 0.953 | 0.945 | 0.966 | 0.96  | 0.959 | 0.971 | 0.941 | 0.938 | 0.941 | 0.956 | 0.956 | 0.948 | 0.935 |
| 14 OM451182.1  | 0.967 | 0.967 | 0.959 | 0.961 | 0.957 | 0.959 | 0.957 | 0.961 | 0.954 | 0.965 | 0.958 | 0.958 | 0.96  | ID    | 0.968 | 0.954 | 0.96  | 0.962 | 0.967 | 0.953 | 0.955 | 0.941 | 0.963 | 0.957 | 0.955 | 0.967 | 0.942 | 0.932 | 0.939 | 0.951 | 0.953 | 0.945 | 0.932 |       |
| 15 MN449341.1  | 0.977 | 0.974 | 0.967 | 0.967 | 0.971 | 0.967 | 0.973 | 0.973 | 0.962 | 0.978 | 0.966 | 0.966 | 0.971 | 0.968 | ID    | 0.961 | 0.975 | 0.977 | 0.98  | 0.96  | 0.955 | 0.946 | 0.976 | 0.969 | 0.965 | 0.977 | 0.944 | 0.937 | 0.941 | 0.957 | 0.957 | 0.945 | 0.942 |       |
| 16 MK201779.1  | 0.959 | 0.961 | 0.959 | 0.958 | 0.956 | 0.955 | 0.956 | 0.953 | 0.952 | 0.965 | 0.957 | 0.957 | 0.963 | 0.954 | 0.961 | ID    | 0.96  | 0.962 | 0.962 | 0.948 | 0.946 | 0.937 | 0.965 | 0.954 | 0.953 | 0.962 | 0.937 | 0.929 | 0.934 | 0.945 | 0.948 | 0.947 | 0.931 |       |
| 17 MK201778.1  | 0.967 | 0.974 | 0.965 | 0.966 | 0.965 | 0.963 | 0.966 | 0.965 | 0.969 | 0.974 | 0.963 | 0.963 | 0.965 | 0.96  | 0.975 | ID    | 0.968 | 0.971 | 0.96  | 0.958 | 0.948 | 0.971 | 0.975 | 0.961 | 0.959 | 0.974 | 0.942 | 0.934 | 0.941 | 0.96  | 0.955 | 0.953 | 0.94  |       |
| 18 MK201776.1  | 0.973 | 0.971 | 0.968 | 0.967 | 0.971 | 0.967 | 0.969 | 0.971 | 0.969 | 0.976 | 0.965 | 0.965 | 0.975 | 0.962 | 0.977 | 0.962 | 0.968 | ID    | 0.985 | 0.957 | 0.955 | 0.943 | 0.971 | 0.963 | 0.958 | 0.972 | 0.941 | 0.937 | 0.942 | 0.956 | 0.956 | 0.951 | 0.937 |       |
| 19 MK201777.1  | 0.974 | 0.977 | 0.971 | 0.971 | 0.972 | 0.97  | 0.977 | 0.972 | 0.962 | 0.983 | 0.965 | 0.965 | 0.978 | 0.967 | 0.98  | 0.962 | 0.971 | 0.985 | ID    | 0.96  | 0.957 | 0.943 | 0.975 | 0.967 | 0.961 | 0.973 | 0.942 | 0.936 | 0.941 | 0.957 | 0.956 | 0.95  | 0.936 |       |
| 20 MT610361.1  | 0.961 | 0.963 | 0.957 | 0.958 | 0.954 | 0.958 | 0.955 | 0.955 | 0.951 | 0.962 | 0.959 | 0.959 | 0.955 | 0.953 | 0.96  | 0.948 | 0.96  | 0.957 | 0.96  | ID    | 0.947 | 0.934 | 0.959 | 0.956 | 0.955 | 0.961 | 0.932 | 0.929 | 0.931 | 0.945 | 0.944 | 0.94  | 0.931 |       |
| 21 MH747478.1  | 0.955 | 0.956 | 0.95  | 0.952 | 0.951 | 0.95  | 0.947 | 0.949 | 0.948 | 0.957 | 0.95  | 0.95  | 0.953 | 0.955 | 0.955 | 0.946 | 0.958 | 0.955 | 0.957 | 0.947 | ID    | 0.945 | 0.956 | 0.952 | 0.947 | 0.959 | 0.941 | 0.933 | 0.938 | 0.953 | 0.953 | 0.947 | 0.938 |       |
| 22 MN337880.1  | 0.949 | 0.945 | 0.945 | 0.944 | 0.939 | 0.944 | 0.938 | 0.938 | 0.937 | 0.947 | 0.944 | 0.944 | 0.945 | 0.941 | 0.946 | 0.937 | 0.948 | 0.943 | 0.943 | 0.934 | 0.945 | ID    | 0.941 | 0.941 | 0.939 | 0.947 | 0.929 | 0.937 | 0.942 | 0.938 | 0.948 | 0.935 |       |       |
| 23 MF062158.1  | 0.973 | 0.977 | 0.969 | 0.97  | 0.965 | 0.967 | 0.969 | 0.964 | 0.963 | 0.977 | 0.963 | 0.963 | 0.966 | 0.963 | 0.976 | 0.965 | 0.971 | 0.971 | 0.975 | 0.959 | 0.956 | 0.941 | ID    | 0.966 | 0.969 | 0.974 | 0.938 | 0.932 | 0.937 | 0.952 | 0.951 | 0.945 | 0.935 |       |
| 24 KP924623.1  | 0.965 | 0.97  | 0.966 | 0.963 | 0.959 | 0.963 | 0.958 | 0.963 | 0.958 | 0.971 | 0.96  | 0.96  | 0.96  | 0.957 | 0.969 | 0.954 | 0.961 | 0.963 | 0.967 | 0.956 | 0.952 | 0.941 | 0.966 | ID    | 0.962 | 0.968 | 0.936 | 0.93  | 0.936 | 0.95  | 0.948 | 0.943 | 0.932 |       |
| 25 MH052678.1  | 0.965 | 0.967 | 0.96  | 0.959 | 0.962 | 0.961 | 0.958 | 0.962 | 0.956 | 0.965 | 0.959 | 0.959 | 0.959 | 0.955 | 0.965 | 0.953 | 0.959 | 0.958 | 0.961 | 0.955 | 0.947 | 0.939 | 0.959 | 0.962 | ID    | 0.963 | 0.941 | 0.935 | 0.942 | 0.955 | 0.95  | 0.948 | 0.929 |       |
| 26 JQ911763.1  | 0.973 | 0.975 | 0.971 | 0.969 | 0.973 | 0.97  | 0.969 | 0.966 | 0.962 | 0.977 | 0.966 | 0.966 | 0.967 | 0.971 | 0.967 | 0.977 | 0.962 | 0.974 | 0.972 | 0.973 | 0.961 | 0.959 | 0.947 | 0.974 | 0.968 | 0.963 | ID    | 0.943 | 0.941 | 0.944 | 0.957 | 0.958 | 0.954 | 0.942 |
| 27 KM1068050.1 | 0.944 | 0.944 | 0.943 | 0.939 | 0.943 | 0.943 | 0.938 | 0.939 | 0.936 | 0.942 | 0.942 | 0.942 | 0.941 | 0.942 | 0.944 | 0.937 | 0.942 | 0.941 | 0.942 | 0.932 | 0.941 | 0.937 | 0.938 | 0.936 | 0.941 | 0.943 | ID    | 0.974 | 0.984 | 0.935 | 0.936 | 0.951 | 0.942 |       |
| 28 KM1068049.1 | 0.938 | 0.936 | 0.932 | 0.932 | 0.935 | 0.939 | 0.931 | 0.933 | 0.933 | 0.937 | 0.936 | 0.936 | 0.938 | 0.932 | 0.937 | 0.929 | 0.934 | 0.937 | 0.936 | 0.929 | 0.933 | 0.929 | 0.932 | 0.93  | 0.935 | 0.941 | 0.974 | ID    | 0.973 | 0.93  | 0.93  | 0.944 | 0.953 |       |
| 29 KM1068051.1 | 0.943 | 0.941 | 0.938 | 0.937 | 0.942 | 0.942 | 0.937 | 0.939 | 0.934 | 0.942 | 0.942 | 0.942 | 0.941 | 0.939 | 0.941 | 0.934 | 0.941 | 0.942 | 0.941 | 0.931 | 0.938 | 0.935 | 0.937 | 0.936 | 0.942 | 0.944 | 0.984 | 0.973 | ID    | 0.937 | 0.933 | 0.95  | 0.936 |       |
| 30 JN088541.1  | 0.956 | 0.957 | 0.95  | 0.953 | 0.957 | 0.956 | 0.955 | 0.954 | 0.95  | 0.959 | 0.952 | 0.953 | 0.956 | 0.951 | 0.957 | 0.945 | 0.96  | 0.956 | 0.957 | 0.945 | 0.953 | 0.942 | 0.952 | 0.95  | 0.955 | 0.957 | 0.935 | 0.93  | 0.937 | ID    | 0.969 | 0.963 | 0.953 |       |
| 31 JN387133.1  | 0.953 | 0.954 | 0.951 | 0.951 | 0.955 | 0.952 | 0.953 | 0.95  | 0.951 | 0.956 | 0.951 | 0.951 | 0.956 | 0.953 | 0.957 | 0.948 | 0.955 | 0.956 | 0.956 | 0.956 | 0.944 | 0.953 | 0.938 | 0.951 | 0.948 | 0.95  | 0.958 | 0.936 | 0.93  | 0.933 | 0.969 | ID    | 0.948 | 0.935 |
| 32 KC161964.1  | 0.955 | 0.951 | 0.949 | 0.948 | 0.947 | 0.951 | 0.945 | 0.945 | 0.944 | 0.95  | 0.952 | 0.952 | 0.948 | 0.945 | 0.953 | 0.947 | 0.953 | 0.951 | 0.95  | 0.944 | 0.947 | 0.948 | 0.945 | 0.943 | 0.948 | 0.954 | 0.951 | 0.944 | 0.95  | 0.953 | 0.948 | ID    | 0.942 |       |
| 33 KM1068048.1 | 0.938 | 0.937 | 0.934 | 0.934 | 0.936 | 0.938 | 0.935 | 0.932 | 0.932 | 0.931 | 0.937 | 0.935 | 0.935 | 0.935 | 0.932 | 0.942 | 0.931 | 0.94  | 0.937 | 0.936 | 0.931 | 0.938 | 0.935 | 0.935 | 0.932 | 0.929 | 0.942 | 0.942 | 0.953 | 0.936 | 0.935 | 0.935 | 0.942 | ID    |

### Supplementary Table 9f Deduced amino acid sequence similarities of the CaKoV P2 region

| Sequences  | 1  | 2 | 3     | 4 | 5 | 6     | 7 | 8 | 9 | 10    | 11 | 12 | 13 | 14    | 15    | 16 | 17 | 18 | 19 | 20 | 21    | 22 | 23    | 24 | 25    | 26    | 27    | 28   | 29    | 30    | 31 | 32    | 33    |      |
|------------|----|---|-------|---|---|-------|---|---|---|-------|----|----|----|-------|-------|----|----|----|----|----|-------|----|-------|----|-------|-------|-------|------|-------|-------|----|-------|-------|------|
| 1 PP320363 | ID | 1 | 0.998 | 1 | 1 | 0.998 | 1 | 1 | 1 | 0.998 | 1  | 1  | 1  | 0.993 | 1     | 1  | 1  | 1  | 1  | 1  | 0.995 | 1  | 0.986 | 1  | 0.995 | 0.995 | 0.998 | 0.99 | 0.986 | 0.993 | 1  | 0.995 | 0.995 | 0.99 |
| 2 PP320367 | ID | 1 | 0.998 | 1 | 1 | 0.998 | 1 | 1 | 1 | 0.998 | 1  | 1  | 1  | 1     | 0.993 |    |    |    |    |    |       |    |       |    |       |       |       |      |       |       |    |       |       |      |

### Supplementary Table 9g Nucleotide sequence similarities of the CaKoV P3 region

| Sequences      | 1     | 2     | 3     | 4     | 5     | 6     | 7     | 8     | 9     | 10    | 11    | 12    | 13    | 14    | 15    | 16    | 17    | 18    | 19    | 20    | 21    | 22    | 23    | 24    | 25    | 26    | 27    | 28    | 29    | 30    | 31    | 32    | 33    |       |
|----------------|-------|-------|-------|-------|-------|-------|-------|-------|-------|-------|-------|-------|-------|-------|-------|-------|-------|-------|-------|-------|-------|-------|-------|-------|-------|-------|-------|-------|-------|-------|-------|-------|-------|-------|
| 1 PP320363     | ID    | 0.977 | 0.979 | 0.973 | 0.974 | 0.969 | 0.974 | 0.968 | 0.971 | 0.967 | 0.965 | 0.965 | 0.963 | 0.974 | 0.974 | 0.971 | 0.973 | 0.975 | 0.973 | 0.964 | 0.951 | 0.951 | 0.969 | 0.96  | 0.96  | 0.977 | 0.945 | 0.943 | 0.947 | 0.952 | 0.953 | 0.958 | 0.948 |       |
| 2 PP320367     | 0.977 | ID    | 0.975 | 0.97  | 0.98  | 0.973 | 0.976 | 0.969 | 0.972 | 0.97  | 0.967 | 0.967 | 0.967 | 0.974 | 0.976 | 0.97  | 0.973 | 0.977 | 0.976 | 0.965 | 0.951 | 0.95  | 0.97  | 0.963 | 0.958 | 0.979 | 0.942 | 0.94  | 0.944 | 0.954 | 0.95  | 0.957 | 0.944 |       |
| 3 PP320368     | 0.979 | 0.975 | ID    | 0.971 | 0.974 | 0.968 | 0.97  | 0.967 | 0.969 | 0.964 | 0.961 | 0.961 | 0.959 | 0.97  | 0.974 | 0.972 | 0.973 | 0.971 | 0.971 | 0.964 | 0.95  | 0.948 | 0.966 | 0.957 | 0.959 | 0.973 | 0.941 | 0.941 | 0.943 | 0.951 | 0.948 | 0.954 | 0.944 |       |
| 4 PP320362     | 0.973 | 0.97  | 0.971 | ID    | 0.972 | 0.966 | 0.97  | 0.962 | 0.965 | 0.965 | 0.961 | 0.961 | 0.958 | 0.97  | 0.972 | 0.964 | 0.969 | 0.97  | 0.969 | 0.961 | 0.944 | 0.946 | 0.966 | 0.957 | 0.951 | 0.974 | 0.942 | 0.941 | 0.945 | 0.949 | 0.946 | 0.949 | 0.945 |       |
| 5 PP320369     | 0.974 | 0.98  | 0.974 | 0.972 | ID    | 0.971 | 0.976 | 0.967 | 0.972 | 0.97  | 0.966 | 0.966 | 0.961 | 0.979 | 0.976 | 0.972 | 0.972 | 0.979 | 0.977 | 0.966 | 0.95  | 0.951 | 0.972 | 0.962 | 0.964 | 0.982 | 0.95  | 0.946 | 0.951 | 0.956 | 0.955 | 0.959 | 0.949 |       |
| 6 PP320364     | 0.969 | 0.973 | 0.968 | 0.966 | 0.971 | ID    | 0.974 | 0.972 | 0.969 | 0.967 | 0.963 | 0.963 | 0.965 | 0.97  | 0.974 | 0.971 | 0.973 | 0.973 | 0.972 | 0.966 | 0.949 | 0.948 | 0.967 | 0.956 | 0.96  | 0.976 | 0.939 | 0.938 | 0.941 | 0.95  | 0.945 | 0.952 | 0.942 |       |
| 7 PP320365     | 0.974 | 0.976 | 0.97  | 0.97  | 0.976 | 0.974 | ID    | 0.969 | 0.97  | 0.97  | 0.965 | 0.965 | 0.962 | 0.971 | 0.973 | 0.967 | 0.97  | 0.976 | 0.973 | 0.964 | 0.951 | 0.949 | 0.971 | 0.961 | 0.959 | 0.979 | 0.943 | 0.943 | 0.944 | 0.951 | 0.948 | 0.952 | 0.946 |       |
| 8 PP320366     | 0.968 | 0.969 | 0.967 | 0.962 | 0.967 | 0.972 | 0.969 | ID    | 0.966 | 0.961 | 0.957 | 0.957 | 0.96  | 0.968 | 0.97  | 0.967 | 0.967 | 0.97  | 0.967 | 0.961 | 0.948 | 0.946 | 0.964 | 0.954 | 0.954 | 0.97  | 0.938 | 0.938 | 0.939 | 0.949 | 0.945 | 0.951 | 0.941 |       |
| 9 PP320370     | 0.971 | 0.972 | 0.969 | 0.965 | 0.972 | 0.969 | 0.97  | 0.966 | ID    | 0.964 | 0.962 | 0.962 | 0.964 | 0.976 | 0.968 | 0.968 | 0.97  | 0.974 | 0.973 | 0.965 | 0.948 | 0.945 | 0.97  | 0.941 | 0.973 | 0.943 | 0.943 | 0.949 | 0.948 | 0.951 | 0.941 | 0.941 | 0.941 |       |
| 10 PP320361    | 0.967 | 0.97  | 0.964 | 0.965 | 0.97  | 0.967 | 0.97  | 0.961 | 0.964 | ID    | 0.977 | 0.977 | 0.964 | 0.968 | 0.968 | 0.967 | 0.966 | 0.969 | 0.967 | 0.961 | 0.948 | 0.95  | 0.964 | 0.957 | 0.959 | 0.972 | 0.944 | 0.942 | 0.947 | 0.953 | 0.948 | 0.955 | 0.947 |       |
| 11 PP320359    | 0.965 | 0.967 | 0.961 | 0.961 | 0.966 | 0.963 | 0.965 | 0.957 | 0.962 | 0.977 | ID    | 1     | 0.961 | 0.963 | 0.969 | 0.965 | 0.964 | 0.967 | 0.964 | 0.956 | 0.943 | 0.945 | 0.961 | 0.956 | 0.955 | 0.969 | 0.942 | 0.939 | 0.944 | 0.95  | 0.945 | 0.949 | 0.943 |       |
| 12 PP320360    | 0.965 | 0.967 | 0.961 | 0.961 | 0.966 | 0.963 | 0.965 | 0.957 | 0.962 | 0.977 | 1     | ID    | 0.961 | 0.963 | 0.969 | 0.965 | 0.964 | 0.967 | 0.964 | 0.956 | 0.943 | 0.945 | 0.961 | 0.956 | 0.955 | 0.969 | 0.942 | 0.939 | 0.944 | 0.95  | 0.945 | 0.949 | 0.943 |       |
| 13 PP320358    | 0.963 | 0.967 | 0.959 | 0.958 | 0.961 | 0.965 | 0.962 | 0.96  | 0.964 | 0.964 | 0.961 | 0.961 | ID    | 0.964 | 0.965 | 0.963 | 0.964 | 0.966 | 0.963 | 0.957 | 0.949 | 0.945 | 0.967 | 0.938 | 0.937 | 0.941 | 0.945 | 0.944 | 0.945 | 0.944 | 0.945 | 0.939 |       |       |
| 14 OM451182.1  | 0.974 | 0.974 | 0.97  | 0.97  | 0.979 | 0.97  | 0.971 | 0.968 | 0.976 | 0.968 | 0.963 | 0.963 | 0.964 | ID    | 0.976 | 0.969 | 0.971 | 0.978 | 0.976 | 0.966 | 0.95  | 0.948 | 0.97  | 0.961 | 0.962 | 0.979 | 0.946 | 0.944 | 0.948 | 0.955 | 0.952 | 0.958 | 0.946 |       |
| 15 MN449341.1  | 0.974 | 0.976 | 0.974 | 0.972 | 0.976 | 0.974 | 0.973 | 0.97  | 0.968 | 0.968 | 0.969 | 0.969 | 0.965 | 0.976 | ID    | 0.978 | 0.978 | 0.976 | 0.974 | 0.967 | 0.948 | 0.951 | 0.969 | 0.961 | 0.96  | 0.981 | 0.942 | 0.939 | 0.944 | 0.951 | 0.95  | 0.955 | 0.942 |       |
| 16 MK201779.1  | 0.971 | 0.97  | 0.972 | 0.964 | 0.972 | 0.971 | 0.967 | 0.965 | 0.968 | 0.967 | 0.965 | 0.965 | 0.963 | 0.969 | 0.978 | ID    | 0.988 | 0.973 | 0.971 | 0.963 | 0.946 | 0.949 | 0.964 | 0.957 | 0.96  | 0.974 | 0.939 | 0.936 | 0.942 | 0.949 | 0.95  | 0.955 | 0.94  |       |
| 17 MK201778.1  | 0.973 | 0.973 | 0.973 | 0.969 | 0.972 | 0.973 | 0.97  | 0.97  | 0.97  | 0.966 | 0.964 | 0.964 | 0.964 | 0.971 | 0.978 | 0.988 | ID    | 0.976 | 0.974 | 0.966 | 0.948 | 0.949 | 0.966 | 0.96  | 0.96  | 0.976 | 0.942 | 0.94  | 0.944 | 0.95  | 0.949 | 0.955 | 0.942 |       |
| 18 MK201776.1  | 0.975 | 0.977 | 0.971 | 0.97  | 0.979 | 0.973 | 0.976 | 0.97  | 0.974 | 0.969 | 0.967 | 0.967 | 0.966 | 0.978 | 0.976 | 0.973 | 0.976 | ID    | 0.995 | 0.97  | 0.953 | 0.948 | 0.973 | 0.963 | 0.962 | 0.983 | 0.942 | 0.941 | 0.944 | 0.952 | 0.952 | 0.957 | 0.946 |       |
| 19 MK201777.1  | 0.973 | 0.976 | 0.971 | 0.969 | 0.977 | 0.972 | 0.973 | 0.967 | 0.973 | 0.967 | 0.973 | 0.967 | 0.964 | 0.964 | 0.974 | 0.971 | 0.974 | 0.995 | ID    | 0.969 | 0.952 | 0.947 | 0.971 | 0.96  | 0.96  | 0.98  | 0.941 | 0.94  | 0.943 | 0.951 | 0.95  | 0.957 | 0.944 |       |
| 20 MT1610361.1 | 0.964 | 0.965 | 0.964 | 0.961 | 0.966 | 0.966 | 0.964 | 0.961 | 0.965 | 0.961 | 0.956 | 0.956 | 0.957 | 0.966 | 0.967 | 0.963 | 0.966 | 0.97  | 0.969 | ID    | 0.948 | 0.948 | 0.961 | 0.955 | 0.957 | 0.971 | 0.94  | 0.939 | 0.942 | 0.948 | 0.945 | 0.952 | 0.943 |       |
| 21 MH747478.1  | 0.951 | 0.951 | 0.95  | 0.944 | 0.95  | 0.949 | 0.951 | 0.948 | 0.948 | 0.948 | 0.943 | 0.943 | 0.949 | 0.95  | 0.948 | 0.946 | 0.948 | 0.953 | 0.952 | 0.948 | ID    | 0.949 | 0.948 | 0.941 | 0.942 | 0.951 | 0.939 | 0.94  | 0.944 | 0.951 | 0.946 | 0.95  | 0.943 |       |
| 22 MN337880.1  | 0.951 | 0.95  | 0.948 | 0.946 | 0.951 | 0.948 | 0.949 | 0.946 | 0.945 | 0.945 | 0.945 | 0.945 | 0.948 | 0.951 | 0.949 | 0.949 | 0.948 | 0.947 | 0.948 | 0.949 | ID    | 0.946 | 0.935 | 0.941 | 0.948 | 0.939 | 0.937 | 0.939 | 0.951 | 0.948 | 0.953 | 0.943 |       |       |
| 23 MF062158.1  | 0.969 | 0.97  | 0.966 | 0.966 | 0.972 | 0.967 | 0.971 | 0.964 | 0.97  | 0.964 | 0.961 | 0.961 | 0.957 | 0.97  | 0.969 | 0.964 | 0.966 | 0.967 | 0.973 | 0.971 | 0.961 | 0.948 | 0.946 | ID    | 0.961 | 0.956 | 0.975 | 0.941 | 0.938 | 0.941 | 0.95  | 0.949 | 0.954 | 0.941 |
| 24 KP924623.1  | 0.96  | 0.963 | 0.967 | 0.957 | 0.962 | 0.956 | 0.961 | 0.954 | 0.959 | 0.957 | 0.956 | 0.956 | 0.95  | 0.961 | 0.961 | 0.957 | 0.96  | 0.963 | 0.96  | 0.955 | 0.941 | 0.935 | 0.961 | ID    | 0.952 | 0.967 | 0.932 | 0.931 | 0.935 | 0.94  | 0.936 | 0.942 | 0.933 |       |
| 25 MH052678.1  | 0.96  | 0.958 | 0.959 | 0.951 | 0.964 | 0.96  | 0.959 | 0.954 | 0.959 | 0.959 | 0.955 | 0.955 | 0.953 | 0.962 | 0.96  | 0.96  | 0.96  | 0.962 | 0.96  | 0.957 | 0.942 | 0.941 | 0.956 | 0.952 | ID    | 0.968 | 0.937 | 0.936 | 0.941 | 0.947 | 0.944 | 0.946 | 0.94  |       |
| 26 JQ911763.1  | 0.977 | 0.979 | 0.973 | 0.974 | 0.982 | 0.976 | 0.979 | 0.97  | 0.974 | 0.972 | 0.969 | 0.969 | 0.967 | 0.979 | 0.981 | 0.976 | 0.976 | 0.983 | 0.98  | 0.971 | 0.951 | 0.948 | 0.975 | 0.967 | 0.968 | ID    | 0.946 | 0.943 | 0.947 | 0.955 | 0.953 | 0.947 | 0.946 |       |
| 27 KM1068050.1 | 0.945 | 0.942 | 0.941 | 0.942 | 0.95  | 0.939 | 0.943 | 0.938 | 0.941 | 0.944 | 0.942 | 0.942 | 0.938 | 0.946 | 0.942 | 0.939 | 0.942 | 0.942 | 0.941 | 0.94  | 0.939 | 0.939 | 0.941 | 0.932 | 0.937 | 0.946 | ID    | 0.985 | 0.99  | 0.946 | 0.947 | 0.943 | 0.953 |       |
| 28 KM1068049.1 | 0.943 | 0.94  | 0.941 | 0.941 | 0.946 | 0.938 | 0.943 | 0.938 | 0.938 | 0.942 | 0.939 | 0.939 | 0.937 | 0.944 | 0.939 | 0.936 | 0.94  | 0.941 | 0.94  | 0.939 | 0.939 | 0.937 | 0.938 | 0.931 | 0.936 | 0.943 | 0.985 | ID    | 0.982 | 0.945 | 0.945 | 0.938 | 0.962 |       |
| 29 KM1068051.1 | 0.947 | 0.944 | 0.943 | 0.945 | 0.951 | 0.941 | 0.944 | 0.939 | 0.943 | 0.947 | 0.944 | 0.944 | 0.941 | 0.948 | 0.944 | 0.942 | 0.944 | 0.944 | 0.943 | 0.942 | 0.94  | 0.939 | 0.941 | 0.935 | 0.941 | 0.947 | 0.99  | 0.982 | ID    | 0.947 | 0.948 | 0.944 | 0.956 |       |
| 30 JN088541.1  | 0.952 | 0.954 | 0.951 | 0.949 | 0.956 | 0.95  | 0.951 | 0.949 | 0.949 | 0.953 | 0.95  | 0.95  | 0.945 | 0.955 | 0.951 | 0.949 | 0.95  | 0.948 | 0.951 | 0.952 | 0.951 | 0.948 | 0.951 | 0.95  | 0.94  | 0.947 | 0.955 | 0.946 | 0.945 | 0.947 | ID    | 0.967 | 0.953 | 0.951 |
| 31 JN387133.1  | 0.953 | 0.95  | 0.948 | 0.946 | 0.955 | 0.945 | 0.948 | 0.945 | 0.948 | 0.948 | 0.945 | 0.945 | 0.944 | 0.952 | 0.95  | 0.95  | 0.949 | 0.952 | 0.95  | 0.945 | 0.946 | 0.948 | 0.949 | 0.936 | 0.944 | 0.953 | 0.947 | 0.945 | 0.948 | 0.967 | ID    | 0.953 | 0.951 |       |
| 32 KC161964.1  | 0.958 | 0.957 | 0.954 | 0.949 | 0.959 | 0.952 | 0.952 | 0.951 | 0.951 | 0.955 | 0.949 | 0.949 | 0.945 | 0.958 | 0.955 | 0.955 | 0.955 | 0.957 | 0.957 | 0.952 | 0.95  | 0.953 | 0.954 | 0.942 | 0.946 | 0.957 | 0.943 | 0.    |       |       |       |       |       |       |

**Supplementary Table 9i** Nucleotide sequence similarities of the CaKoV VP1 gene

| Sequences      | 1     | 2     | 3     | 4     | 5     | 6     | 7     | 8     | 9     | 10    | 11    | 12    | 13    | 14    | 15    | 16    | 17    | 18    | 19    | 20    | 21    | 22    | 23    | 24    | 25    | 26    | 27    | 28    | 29    | 30    | 31    | 32    | 33    |       |
|----------------|-------|-------|-------|-------|-------|-------|-------|-------|-------|-------|-------|-------|-------|-------|-------|-------|-------|-------|-------|-------|-------|-------|-------|-------|-------|-------|-------|-------|-------|-------|-------|-------|-------|-------|
| 1 PP320363     | ID    | 0.946 | 0.948 | 0.944 | 0.976 | 0.958 | 0.904 | 0.87  | 0.868 | 0.954 | 0.949 | 0.949 | 0.94  | 0.919 | 0.95  | 0.943 | 0.949 | 0.949 | 0.954 | 0.851 | 0.829 | 0.852 | 0.947 | 0.865 | 0.871 | 0.907 | 0.85  | 0.846 | 0.854 | 0.857 | 0.864 | 0.87  | 0.854 |       |
| 2 PP320367     | 0.946 | ID    | 0.932 | 0.936 | 0.941 | 0.94  | 0.899 | 0.87  | 0.865 | 0.93  | 0.931 | 0.931 | 0.925 | 0.906 | 0.929 | 0.926 | 0.925 | 0.929 | 0.929 | 0.849 | 0.829 | 0.856 | 0.922 | 0.862 | 0.858 | 0.885 | 0.839 | 0.838 | 0.844 | 0.861 | 0.865 | 0.862 | 0.839 |       |
| 3 PP320368     | 0.948 | 0.932 | ID    | 0.942 | 0.936 | 0.935 | 0.901 | 0.869 | 0.866 | 0.938 | 0.935 | 0.935 | 0.913 | 0.962 | 0.937 | 0.936 | 0.96  | 0.965 | 0.84  | 0.826 | 0.85  | 0.959 | 0.859 | 0.866 | 0.9   | 0.833 | 0.832 | 0.841 | 0.852 | 0.851 | 0.869 | 0.847 |       |       |
| 4 PP320362     | 0.944 | 0.936 | 0.942 | ID    | 0.94  | 0.944 | 0.89  | 0.862 | 0.862 | 0.94  | 0.935 | 0.935 | 0.936 | 0.91  | 0.94  | 0.931 | 0.931 | 0.94  | 0.944 | 0.844 | 0.828 | 0.851 | 0.937 | 0.859 | 0.859 | 0.884 | 0.828 | 0.827 | 0.835 | 0.857 | 0.854 | 0.86  | 0.838 |       |
| 5 PP320369     | 0.976 | 0.941 | 0.936 | 0.94  | ID    | 0.953 | 0.902 | 0.872 | 0.872 | 0.948 | 0.948 | 0.948 | 0.935 | 0.91  | 0.941 | 0.938 | 0.943 | 0.937 | 0.942 | 0.848 | 0.817 | 0.851 | 0.937 | 0.866 | 0.869 | 0.901 | 0.838 | 0.834 | 0.842 | 0.855 | 0.864 | 0.859 | 0.847 |       |
| 6 PP320364     | 0.958 | 0.94  | 0.935 | 0.944 | 0.953 | ID    | 0.905 | 0.869 | 0.874 | 0.948 | 0.941 | 0.941 | 0.94  | 0.904 | 0.94  | 0.944 | 0.935 | 0.941 | 0.946 | 0.854 | 0.824 | 0.845 | 0.937 | 0.868 | 0.871 | 0.89  | 0.834 | 0.833 | 0.844 | 0.867 | 0.864 | 0.869 | 0.844 |       |
| 7 PP320365     | 0.904 | 0.899 | 0.901 | 0.89  | 0.902 | 0.905 | ID    | 0.868 | 0.868 | 0.892 | 0.894 | 0.894 | 0.907 | 0.9   | 0.895 | 0.908 | 0.895 | 0.896 | 0.899 | 0.84  | 0.894 | 0.816 | 0.857 | 0.894 | 0.841 | 0.854 | 0.851 | 0.832 | 0.822 | 0.83  | 0.846 | 0.85  | 0.852 | 0.846 |
| 8 PP320366     | 0.87  | 0.87  | 0.869 | 0.862 | 0.872 | 0.869 | 0.868 | ID    | 0.979 | 0.868 | 0.869 | 0.869 | 0.869 | 0.853 | 0.868 | 0.868 | 0.875 | 0.87  | 0.871 | 0.882 | 0.869 | 0.906 | 0.863 | 0.898 | 0.901 | 0.857 | 0.875 | 0.872 | 0.884 | 0.88  | 0.884 | 0.908 | 0.9   |       |
| 9 PP320370     | 0.868 | 0.865 | 0.866 | 0.866 | 0.872 | 0.874 | 0.868 | 0.979 | ID    | 0.868 | 0.869 | 0.869 | 0.871 | 0.848 | 0.864 | 0.865 | 0.875 | 0.863 | 0.866 | 0.883 | 0.872 | 0.905 | 0.86  | 0.9   | 0.907 | 0.854 | 0.878 | 0.871 | 0.883 | 0.881 | 0.883 | 0.912 | 0.898 |       |
| 10 PP320361    | 0.954 | 0.93  | 0.938 | 0.94  | 0.948 | 0.948 | 0.892 | 0.868 | 0.868 | ID    | 0.947 | 0.947 | 0.936 | 0.91  | 0.938 | 0.941 | 0.953 | 0.947 | 0.949 | 0.843 | 0.821 | 0.844 | 0.938 | 0.864 | 0.86  | 0.889 | 0.841 | 0.841 | 0.85  | 0.851 | 0.86  | 0.856 | 0.841 |       |
| 11 PP320359    | 0.949 | 0.931 | 0.935 | 0.935 | 0.948 | 0.941 | 0.894 | 0.869 | 0.869 | 0.947 | ID    | 1     | 0.917 | 0.905 | 0.935 | 0.924 | 0.869 | 0.936 | 0.938 | 0.843 | 0.823 | 0.851 | 0.932 | 0.857 | 0.858 | 0.879 | 0.834 | 0.832 | 0.84  | 0.845 | 0.845 | 0.862 | 0.841 |       |
| 12 PP320360    | 0.949 | 0.931 | 0.935 | 0.935 | 0.948 | 0.941 | 0.894 | 0.869 | 0.869 | 0.947 | 1     | ID    | 0.917 | 0.905 | 0.935 | 0.924 | 0.926 | 0.936 | 0.938 | 0.843 | 0.823 | 0.851 | 0.932 | 0.857 | 0.858 | 0.879 | 0.834 | 0.832 | 0.84  | 0.845 | 0.845 | 0.862 | 0.841 |       |
| 13 PP320358    | 0.94  | 0.925 | 0.935 | 0.936 | 0.935 | 0.94  | 0.907 | 0.869 | 0.871 | 0.936 | 0.917 | 0.917 | ID    | 0.916 | 0.944 | 0.96  | 0.946 | 0.941 | 0.946 | 0.852 | 0.827 | 0.859 | 0.94  | 0.856 | 0.857 | 0.889 | 0.844 | 0.84  | 0.848 | 0.852 | 0.858 | 0.864 | 0.848 |       |
| 14 OM451182.1  | 0.919 | 0.906 | 0.913 | 0.91  | 0.91  | 0.904 | 0.9   | 0.853 | 0.848 | 0.91  | 0.905 | 0.905 | 0.916 | ID    | 0.902 | 0.913 | 0.917 | 0.922 | 0.919 | 0.852 | 0.84  | 0.866 | 0.913 | 0.863 | 0.845 | 0.882 | 0.841 | 0.84  | 0.852 | 0.855 | 0.851 | 0.862 | 0.859 |       |
| 15 MN449341.1  | 0.95  | 0.929 | 0.962 | 0.94  | 0.941 | 0.94  | 0.895 | 0.868 | 0.864 | 0.938 | 0.935 | 0.935 | 0.944 | 0.902 | ID    | 0.944 | 0.936 | 0.964 | 0.965 | 0.849 | 0.823 | 0.844 | 0.959 | 0.863 | 0.845 | 0.862 | 0.903 | 0.832 | 0.832 | 0.84  | 0.849 | 0.85  | 0.862 | 0.839 |
| 16 MK201779.1  | 0.943 | 0.926 | 0.937 | 0.931 | 0.938 | 0.944 | 0.908 | 0.868 | 0.865 | 0.941 | 0.924 | 0.924 | 0.96  | 0.913 | 0.944 | ID    | 0.946 | 0.943 | 0.948 | 0.843 | 0.821 | 0.85  | 0.944 | 0.85  | 0.856 | 0.891 | 0.829 | 0.826 | 0.834 | 0.849 | 0.852 | 0.857 | 0.84  |       |
| 17 MK201778.1  | 0.949 | 0.925 | 0.936 | 0.931 | 0.943 | 0.935 | 0.895 | 0.875 | 0.875 | 0.953 | 0.926 | 0.926 | 0.946 | 0.917 | 0.936 | 0.946 | ID    | 0.937 | 0.942 | 0.851 | 0.835 | 0.853 | 0.941 | 0.865 | 0.864 | 0.9   | 0.834 | 0.83  | 0.836 | 0.855 | 0.868 | 0.863 | 0.844 |       |
| 18 MK201777.1  | 0.949 | 0.929 | 0.96  | 0.94  | 0.937 | 0.941 | 0.896 | 0.87  | 0.863 | 0.947 | 0.936 | 0.936 | 0.941 | 0.922 | 0.964 | 0.943 | 0.937 | ID    | 0.995 | 0.849 | 0.827 | 0.85  | 0.962 | 0.858 | 0.852 | 0.901 | 0.834 | 0.836 | 0.845 | 0.852 | 0.854 | 0.856 | 0.841 |       |
| 19 MK201776.1  | 0.954 | 0.929 | 0.965 | 0.944 | 0.942 | 0.946 | 0.899 | 0.871 | 0.866 | 0.949 | 0.938 | 0.938 | 0.946 | 0.919 | 0.965 | 0.948 | 0.942 | 0.995 | ID    | 0.85  | 0.828 | 0.851 | 0.965 | 0.965 | 0.854 | 0.856 | 0.902 | 0.838 | 0.838 | 0.846 | 0.854 | 0.856 | 0.859 | 0.842 |
| 20 MT610361.1  | 0.851 | 0.849 | 0.84  | 0.844 | 0.848 | 0.854 | 0.84  | 0.882 | 0.883 | 0.843 | 0.843 | 0.843 | 0.852 | 0.852 | 0.849 | 0.843 | 0.851 | 0.849 | 0.85  | ID    | 0.872 | 0.894 | 0.838 | 0.919 | 0.898 | 0.87  | 0.87  | 0.882 | 0.917 | 0.899 | 0.906 | 0.891 |       |       |
| 21 MH747478.1  | 0.829 | 0.829 | 0.826 | 0.828 | 0.817 | 0.824 | 0.816 | 0.869 | 0.872 | 0.821 | 0.823 | 0.823 | 0.827 | 0.84  | 0.823 | 0.821 | 0.835 | 0.827 | 0.828 | 0.872 | ID    | 0.887 | 0.822 | 0.884 | 0.872 | 0.846 | 0.874 | 0.869 | 0.878 | 0.857 | 0.911 | 0.889 |       |       |
| 22 MX337880.1  | 0.852 | 0.856 | 0.85  | 0.851 | 0.851 | 0.845 | 0.857 | 0.906 | 0.905 | 0.844 | 0.851 | 0.851 | 0.859 | 0.866 | 0.844 | 0.85  | 0.853 | 0.85  | 0.851 | 0.894 | 0.887 | ID    | 0.842 | 0.901 | 0.888 | 0.853 | 0.905 | 0.902 | 0.916 | 0.885 | 0.882 | 0.926 | 0.924 |       |
| 23 MF062158.1  | 0.947 | 0.922 | 0.959 | 0.937 | 0.937 | 0.937 | 0.894 | 0.863 | 0.86  | 0.938 | 0.932 | 0.932 | 0.94  | 0.913 | 0.959 | 0.944 | 0.941 | 0.962 | 0.965 | 0.838 | 0.822 | 0.842 | ID    | 0.854 | 0.86  | 0.898 | 0.828 | 0.827 | 0.835 | 0.842 | 0.846 | 0.848 | 0.834 |       |
| 24 KP924623.1  | 0.865 | 0.862 | 0.859 | 0.859 | 0.866 | 0.868 | 0.841 | 0.898 | 0.9   | 0.864 | 0.857 | 0.857 | 0.856 | 0.863 | 0.854 | 0.85  | 0.865 | 0.858 | 0.854 | 0.919 | 0.884 | 0.901 | 0.854 | ID    | 0.93  | 0.867 | 0.88  | 0.88  | 0.895 | 0.922 | 0.916 | 0.929 | 0.91  |       |
| 25 MH052678.1  | 0.871 | 0.858 | 0.866 | 0.859 | 0.869 | 0.871 | 0.854 | 0.901 | 0.907 | 0.86  | 0.858 | 0.858 | 0.857 | 0.845 | 0.862 | 0.856 | 0.864 | 0.852 | 0.856 | 0.898 | 0.872 | 0.888 | 0.86  | 0.93  | ID    | 0.865 | 0.871 | 0.866 | 0.881 | 0.929 | 0.92  | 0.918 | 0.899 |       |
| 26 JQ111763.1  | 0.907 | 0.885 | 0.9   | 0.884 | 0.901 | 0.89  | 0.851 | 0.857 | 0.854 | 0.889 | 0.879 | 0.879 | 0.889 | 0.882 | 0.903 | 0.891 | 0.9   | 0.901 | 0.902 | 0.87  | 0.846 | 0.853 | 0.898 | 0.867 | 0.865 | ID    | 0.857 | 0.855 | 0.85  | 0.874 | 0.865 | 0.869 | 0.854 |       |
| 27 KM1068050.1 | 0.85  | 0.839 | 0.833 | 0.828 | 0.838 | 0.834 | 0.832 | 0.875 | 0.878 | 0.841 | 0.834 | 0.834 | 0.844 | 0.841 | 0.832 | 0.829 | 0.834 | 0.834 | 0.838 | 0.87  | 0.874 | 0.905 | 0.828 | 0.88  | 0.871 | ID    | 0.984 | 0.968 | 0.866 | 0.869 | 0.908 | 0.907 |       |       |
| 28 KM1068049.1 | 0.846 | 0.838 | 0.832 | 0.827 | 0.834 | 0.833 | 0.822 | 0.872 | 0.871 | 0.841 | 0.832 | 0.832 | 0.84  | 0.84  | 0.832 | 0.826 | 0.83  | 0.836 | 0.838 | 0.87  | 0.869 | 0.902 | 0.827 | 0.88  | 0.866 | 0.855 | 0.984 | ID    | 0.979 | 0.867 | 0.866 | 0.906 | 0.907 |       |
| 29 KM1068051.1 | 0.854 | 0.844 | 0.841 | 0.835 | 0.842 | 0.844 | 0.83  | 0.884 | 0.883 | 0.85  | 0.84  | 0.84  | 0.848 | 0.852 | 0.84  | 0.834 | 0.836 | 0.845 | 0.846 | 0.882 | 0.878 | 0.916 | 0.835 | 0.895 | 0.881 | 0.85  | 0.968 | 0.979 | ID    | 0.874 | 0.875 | 0.923 | 0.928 |       |
| 30 JN088541.1  | 0.857 | 0.861 | 0.852 | 0.857 | 0.855 | 0.867 | 0.846 | 0.88  | 0.881 | 0.851 | 0.845 | 0.845 | 0.852 | 0.855 | 0.849 | 0.849 | 0.855 | 0.852 | 0.854 | 0.917 | 0.875 | 0.885 | 0.842 | 0.922 | 0.929 | 0.874 | 0.866 | 0.863 | 0.874 | ID    | 0.948 | 0.909 | 0.885 |       |
| 31 JN387133.1  | 0.864 | 0.865 | 0.851 | 0.854 | 0.864 | 0.864 | 0.85  | 0.884 | 0.883 | 0.86  | 0.845 | 0.845 | 0.858 | 0.851 | 0.85  | 0.852 | 0.868 | 0.854 | 0.856 | 0.899 | 0.857 | 0.882 | 0.846 | 0.916 | 0.92  | 0.865 | 0.869 | 0.866 | 0.875 | 0.948 | ID    | 0.904 | 0.892 |       |
| 32 KC161964.1  | 0.87  | 0.862 | 0.869 | 0.86  | 0.864 | 0.869 | 0.852 | 0.908 | 0.912 | 0.856 | 0.862 | 0.862 | 0.864 | 0.862 | 0.862 | 0.857 | 0.863 | 0.856 | 0.859 | 0.906 | 0.911 | 0.926 | 0.848 | 0.929 | 0.918 | 0.869 | 0.908 | 0.906 | 0.923 | 0.909 | 0.904 | ID    | 0.93  |       |
| 33 KM1068048.1 | 0.854 | 0.839 | 0.847 | 0.838 | 0.847 | 0.844 | 0.846 | 0.9   | 0.898 | 0.841 | 0.841 | 0.841 | 0.848 | 0.859 | 0.839 | 0.84  | 0.844 | 0.841 | 0.842 | 0.891 | 0.889 | 0.924 | 0.834 | 0.91  | 0.899 | 0.854 | 0.907 | 0.907 | 0.928 | 0.885 | 0.892 | 0.93  | ID    |       |

**Supplementary Table 9k** Deduced amino acid sequence similarities of the CaKoV VP1 gene

| Sequences  | 1    | 2    | 3     | 4     | 5     | 6     | 7     | 8     | 9     | 10    | 11    | 12    | 13    | 14    | 15    | 16    | 17    | 18    | 19    | 20    | 21    | 22   | 23   | 24    | 25    | 26    | 27    | 28    | 29    | 30   | 31    | 32    | 33    |
|------------|------|------|-------|-------|-------|-------|-------|-------|-------|-------|-------|-------|-------|-------|-------|-------|-------|-------|-------|-------|-------|------|------|-------|-------|-------|-------|-------|-------|------|-------|-------|-------|
| 1 PP320363 | ID   | 0.96 | 0.964 | 0.964 | 0.996 | 0.964 | 0.946 | 0.896 | 0.9   | 0.971 | 0.96  | 0.96  | 0.978 | 0.921 | 0.96  | 0.975 | 0.964 | 0.967 | 0.978 | 0.854 | 0.825 | 0.85 | 0.96 | 0.868 | 0.886 | 0.882 | 0.843 | 0.825 | 0.836 | 0.85 | 0.864 | 0.871 | 0.846 |
| 2 PP320367 | 0.96 | ID   | 0.953 | 0.946 | 0.957 | 0.939 | 0.943 | 0.9   | 0.896 | 0.946 | 0.939 | 0.939 | 0.953 | 0.914 | 0.932 | 0.95  | 0.953 | 0.95  | 0     |       |       |      |      |       |       |       |       |       |       |      |       |       |       |

### Supplementary Table 9l Nucleotide sequence similarities of the CaKoV 3D gene

| Sequences      | 1     | 2     | 3     | 4     | 5     | 6     | 7     | 8     | 9     | 10    | 11    | 12    | 13    | 14    | 15    | 16    | 17    | 18    | 19    | 20    | 21    | 22    | 23    | 24    | 25    | 26    | 27    | 28    | 29    | 30    | 31    | 32    | 33    |       |
|----------------|-------|-------|-------|-------|-------|-------|-------|-------|-------|-------|-------|-------|-------|-------|-------|-------|-------|-------|-------|-------|-------|-------|-------|-------|-------|-------|-------|-------|-------|-------|-------|-------|-------|-------|
| 1 PP320363     | ID    | 0.976 | 0.975 | 0.975 | 0.977 | 0.978 | 0.977 | 0.972 | 0.972 | 0.967 | 0.97  | 0.97  | 0.969 | 0.978 | 0.976 | 0.976 | 0.977 | 0.977 | 0.97  | 0.97  | 0.966 | 0.962 | 0.975 | 0.959 | 0.962 | 0.976 | 0.95  | 0.95  | 0.955 | 0.955 | 0.964 | 0.971 | 0.957 |       |
| 2 PP320367     | 0.976 | ID    | 0.973 | 0.973 | 0.978 | 0.98  | 0.976 | 0.971 | 0.973 | 0.973 | 0.973 | 0.973 | 0.973 | 0.977 | 0.982 | 0.98  | 0.982 | 0.976 | 0.971 | 0.969 | 0.969 | 0.961 | 0.976 | 0.964 | 0.964 | 0.975 | 0.944 | 0.941 | 0.949 | 0.956 | 0.957 | 0.962 | 0.949 |       |
| 3 PP320368     | 0.975 | 0.973 | ID    | 0.976 | 0.982 | 0.983 | 0.975 | 0.975 | 0.98  | 0.97  | 0.967 | 0.967 | 0.965 | 0.978 | 0.978 | 0.976 | 0.981 | 0.975 | 0.975 | 0.971 | 0.967 | 0.954 | 0.977 | 0.954 | 0.965 | 0.973 | 0.947 | 0.947 | 0.952 | 0.957 | 0.961 | 0.961 | 0.952 |       |
| 4 PP320362     | 0.975 | 0.973 | 0.976 | ID    | 0.981 | 0.978 | 0.977 | 0.967 | 0.972 | 0.967 | 0.97  | 0.97  | 0.962 | 0.977 | 0.978 | 0.976 | 0.978 | 0.973 | 0.969 | 0.971 | 0.96  | 0.956 | 0.977 | 0.956 | 0.959 | 0.975 | 0.946 | 0.944 | 0.951 | 0.952 | 0.955 | 0.964 | 0.949 |       |
| 5 PP320369     | 0.977 | 0.978 | 0.982 | 0.981 | ID    | 0.983 | 0.982 | 0.972 | 0.98  | 0.975 | 0.972 | 0.972 | 0.965 | 0.981 | 0.983 | 0.986 | 0.982 | 0.977 | 0.973 | 0.965 | 0.959 | 0.985 | 0.959 | 0.972 | 0.986 | 0.952 | 0.947 | 0.957 | 0.96  | 0.964 | 0.966 | 0.955 |       |       |
| 6 PP320364     | 0.978 | 0.98  | 0.983 | 0.978 | 0.983 | ID    | 0.981 | 0.978 | 0.981 | 0.976 | 0.976 | 0.976 | 0.971 | 0.98  | 0.985 | 0.985 | 0.987 | 0.978 | 0.976 | 0.976 | 0.969 | 0.959 | 0.981 | 0.957 | 0.969 | 0.977 | 0.946 | 0.946 | 0.951 | 0.956 | 0.96  | 0.967 | 0.954 |       |
| 7 PP320365     | 0.977 | 0.976 | 0.975 | 0.977 | 0.982 | 0.981 | ID    | 0.97  | 0.972 | 0.972 | 0.97  | 0.97  | 0.965 | 0.973 | 0.976 | 0.976 | 0.981 | 0.977 | 0.97  | 0.97  | 0.962 | 0.957 | 0.982 | 0.956 | 0.964 | 0.978 | 0.942 | 0.945 | 0.947 | 0.952 | 0.956 | 0.967 | 0.95  |       |
| 8 PP320366     | 0.972 | 0.971 | 0.975 | 0.967 | 0.972 | 0.978 | 0.97  | ID    | 0.972 | 0.966 | 0.967 | 0.967 | 0.967 | 0.973 | 0.973 | 0.976 | 0.975 | 0.967 | 0.967 | 0.961 | 0.957 | 0.97  | 0.946 | 0.96  | 0.971 | 0.94  | 0.942 | 0.945 | 0.952 | 0.956 | 0.959 | 0.947 |       |       |
| 9 PP320370     | 0.972 | 0.973 | 0.98  | 0.972 | 0.98  | 0.981 | 0.972 | 0.972 | ID    | 0.972 | 0.967 | 0.97  | 0.97  | 0.967 | 0.976 | 0.976 | 0.978 | 0.975 | 0.972 | 0.972 | 0.965 | 0.957 | 0.977 | 0.951 | 0.965 | 0.971 | 0.947 | 0.945 | 0.952 | 0.955 | 0.961 | 0.965 | 0.95  |       |
| 10 PP320361    | 0.967 | 0.973 | 0.97  | 0.967 | 0.975 | 0.976 | 0.972 | 0.966 | 0.97  | ID    | 0.981 | 0.981 | 0.967 | 0.969 | 0.978 | 0.983 | 0.976 | 0.967 | 0.962 | 0.967 | 0.965 | 0.957 | 0.971 | 0.95  | 0.959 | 0.973 | 0.942 | 0.94  | 0.947 | 0.955 | 0.959 | 0.962 | 0.949 |       |
| 11 PP320359    | 0.97  | 0.973 | 0.967 | 0.97  | 0.972 | 0.976 | 0.97  | 0.967 | 0.97  | 0.981 | ID    | 1     | 0.97  | 0.969 | 0.978 | 0.983 | 0.976 | 0.97  | 0.962 | 0.965 | 0.957 | 0.955 | 0.97  | 0.951 | 0.957 | 0.973 | 0.945 | 0.94  | 0.95  | 0.952 | 0.956 | 0.961 | 0.947 |       |
| 12 PP320360    | 0.97  | 0.973 | 0.967 | 0.97  | 0.972 | 0.976 | 0.97  | 0.967 | 0.97  | 0.981 | 1     | ID    | 0.97  | 0.969 | 0.978 | 0.983 | 0.976 | 0.97  | 0.962 | 0.965 | 0.957 | 0.955 | 0.97  | 0.951 | 0.957 | 0.973 | 0.945 | 0.94  | 0.95  | 0.952 | 0.956 | 0.961 | 0.947 |       |
| 13 PP320358    | 0.969 | 0.973 | 0.965 | 0.962 | 0.965 | 0.971 | 0.965 | 0.967 | 0.967 | 0.967 | 0.97  | 0.97  | ID    | 0.969 | 0.973 | 0.971 | 0.971 | 0.967 | 0.96  | 0.96  | 0.969 | 0.955 | 0.962 | 0.95  | 0.952 | 0.966 | 0.94  | 0.938 | 0.945 | 0.955 | 0.959 | 0.956 | 0.947 |       |
| 14 OM451182.1  | 0.978 | 0.977 | 0.978 | 0.977 | 0.981 | 0.98  | 0.973 | 0.973 | 0.976 | 0.969 | 0.969 | 0.969 | 0.969 | ID    | 0.98  | 0.977 | 0.98  | 0.978 | 0.973 | 0.972 | 0.967 | 0.96  | 0.976 | 0.955 | 0.964 | 0.975 | 0.949 | 0.949 | 0.954 | 0.959 | 0.962 | 0.967 | 0.954 |       |
| 15 MN449341.1  | 0.978 | 0.982 | 0.978 | 0.978 | 0.983 | 0.985 | 0.976 | 0.973 | 0.976 | 0.978 | 0.978 | 0.973 | 0.98  | ID    | 0.99  | 0.987 | 0.978 | 0.978 | 0.973 | 0.976 | 0.969 | 0.959 | 0.978 | 0.96  | 0.966 | 0.982 | 0.949 | 0.944 | 0.954 | 0.959 | 0.962 | 0.965 | 0.951 |       |
| 16 MK201779.1  | 0.976 | 0.98  | 0.976 | 0.976 | 0.983 | 0.985 | 0.976 | 0.973 | 0.978 | 0.983 | 0.983 | 0.983 | 0.971 | 0.977 | 0.99  | ID    | 0.987 | 0.978 | 0.973 | 0.973 | 0.966 | 0.959 | 0.978 | 0.96  | 0.969 | 0.982 | 0.946 | 0.941 | 0.951 | 0.956 | 0.962 | 0.965 | 0.951 |       |
| 17 MK201778.1  | 0.976 | 0.982 | 0.981 | 0.978 | 0.986 | 0.987 | 0.981 | 0.976 | 0.978 | 0.976 | 0.976 | 0.976 | 0.971 | 0.98  | 0.987 | 0.987 | ID    | 0.978 | 0.975 | 0.976 | 0.969 | 0.956 | 0.981 | 0.964 | 0.969 | 0.982 | 0.949 | 0.946 | 0.954 | 0.956 | 0.96  | 0.964 | 0.951 |       |
| 18 MK201776.1  | 0.977 | 0.976 | 0.975 | 0.973 | 0.982 | 0.978 | 0.977 | 0.975 | 0.975 | 0.967 | 0.97  | 0.97  | 0.967 | 0.978 | 0.978 | 0.978 | 0.978 | ID    | 0.987 | 0.973 | 0.967 | 0.956 | 0.977 | 0.954 | 0.97  | 0.978 | 0.947 | 0.947 | 0.952 | 0.957 | 0.961 | 0.964 | 0.957 |       |
| 19 MK201777.1  | 0.97  | 0.971 | 0.975 | 0.969 | 0.977 | 0.976 | 0.97  | 0.967 | 0.972 | 0.962 | 0.962 | 0.962 | 0.96  | 0.973 | 0.973 | 0.973 | 0.975 | 0.987 | ID    | 0.969 | 0.965 | 0.951 | 0.97  | 0.946 | 0.965 | 0.971 | 0.945 | 0.945 | 0.95  | 0.952 | 0.956 | 0.964 | 0.95  |       |
| 20 MT610361.1  | 0.97  | 0.969 | 0.971 | 0.971 | 0.973 | 0.976 | 0.97  | 0.967 | 0.972 | 0.967 | 0.965 | 0.965 | 0.96  | 0.972 | 0.976 | 0.973 | 0.976 | 0.973 | 0.969 | ID    | 0.959 | 0.954 | 0.97  | 0.949 | 0.959 | 0.97  | 0.945 | 0.945 | 0.95  | 0.952 | 0.954 | 0.964 | 0.952 |       |
| 21 MH747478.1  | 0.966 | 0.969 | 0.967 | 0.96  | 0.965 | 0.969 | 0.962 | 0.961 | 0.965 | 0.965 | 0.957 | 0.957 | 0.969 | 0.967 | 0.969 | 0.966 | 0.969 | 0.967 | 0.965 | 0.959 | ID    | 0.961 | 0.964 | 0.944 | 0.95  | 0.959 | 0.95  | 0.951 | 0.955 | 0.956 | 0.961 | 0.962 | 0.956 |       |
| 22 MN337880.1  | 0.962 | 0.961 | 0.954 | 0.956 | 0.959 | 0.959 | 0.957 | 0.957 | 0.957 | 0.957 | 0.955 | 0.955 | 0.955 | 0.96  | 0.959 | 0.959 | 0.956 | 0.956 | 0.951 | 0.954 | 0.961 | ID    | 0.956 | 0.935 | 0.944 | 0.95  | 0.941 | 0.941 | 0.946 | 0.96  | 0.961 | 0.959 | 0.949 |       |
| 23 MF062158.1  | 0.975 | 0.976 | 0.977 | 0.977 | 0.985 | 0.981 | 0.982 | 0.97  | 0.977 | 0.971 | 0.97  | 0.97  | 0.962 | 0.976 | 0.978 | 0.978 | 0.981 | 0.977 | 0.97  | 0.97  | 0.964 | 0.956 | ID    | 0.959 | 0.965 | 0.976 | 0.944 | 0.941 | 0.949 | 0.954 | 0.957 | 0.964 | 0.949 |       |
| 24 KF924623.1  | 0.959 | 0.964 | 0.954 | 0.956 | 0.959 | 0.957 | 0.956 | 0.946 | 0.951 | 0.95  | 0.951 | 0.951 | 0.95  | 0.955 | 0.96  | 0.96  | 0.964 | 0.954 | 0.946 | 0.949 | 0.944 | 0.935 | 0.959 | ID    | 0.941 | 0.955 | 0.925 | 0.923 | 0.93  | 0.93  | 0.938 | 0.94  | 0.928 |       |
| 25 MH052678.1  | 0.962 | 0.964 | 0.965 | 0.959 | 0.972 | 0.969 | 0.964 | 0.96  | 0.965 | 0.959 | 0.957 | 0.957 | 0.952 | 0.964 | 0.966 | 0.969 | 0.969 | 0.97  | 0.965 | 0.959 | 0.95  | 0.944 | 0.965 | 0.941 | ID    | 0.97  | 0.94  | 0.94  | 0.945 | 0.947 | 0.951 | 0.949 | 0.95  |       |
| 26 JQ911763.1  | 0.976 | 0.975 | 0.973 | 0.975 | 0.986 | 0.977 | 0.978 | 0.971 | 0.971 | 0.973 | 0.973 | 0.973 | 0.966 | 0.975 | 0.982 | 0.982 | 0.982 | 0.978 | 0.971 | 0.97  | 0.959 | 0.95  | 0.976 | 0.955 | 0.97  | ID    | 0.951 | 0.944 | 0.954 | 0.954 | 0.957 | 0.96  | 0.949 |       |
| 27 KM1068050.1 | 0.95  | 0.944 | 0.947 | 0.946 | 0.952 | 0.946 | 0.942 | 0.94  | 0.947 | 0.942 | 0.945 | 0.945 | 0.94  | 0.949 | 0.949 | 0.946 | 0.949 | 0.947 | 0.945 | 0.945 | 0.95  | 0.941 | 0.944 | 0.925 | 0.94  | 0.951 | ID    | 0.98  | 0.99  | 0.952 | 0.952 | 0.949 | 0.952 |       |
| 28 KM068049.1  | 0.95  | 0.941 | 0.947 | 0.944 | 0.947 | 0.946 | 0.945 | 0.942 | 0.945 | 0.94  | 0.94  | 0.94  | 0.938 | 0.949 | 0.944 | 0.941 | 0.946 | 0.947 | 0.945 | 0.945 | 0.951 | 0.941 | 0.941 | 0.923 | 0.94  | 0.944 | 0.98  | ID    | 0.977 | 0.952 | 0.955 | 0.946 | 0.97  |       |
| 29 KM068051.1  | 0.955 | 0.949 | 0.952 | 0.951 | 0.957 | 0.951 | 0.947 | 0.945 | 0.952 | 0.947 | 0.95  | 0.95  | 0.945 | 0.954 | 0.954 | 0.951 | 0.954 | 0.952 | 0.95  | 0.95  | 0.955 | 0.946 | 0.949 | 0.93  | 0.945 | 0.954 | 0.99  | 0.977 | ID    | 0.955 | 0.957 | 0.954 | 0.957 |       |
| 30 JN088541.1  | 0.955 | 0.956 | 0.957 | 0.952 | 0.96  | 0.956 | 0.952 | 0.952 | 0.955 | 0.955 | 0.952 | 0.952 | 0.955 | 0.959 | 0.959 | 0.956 | 0.956 | 0.957 | 0.952 | 0.952 | 0.956 | 0.96  | 0.954 | 0.93  | 0.947 | 0.954 | 0.952 | 0.952 | 0.955 | ID    | 0.975 | 0.956 | 0.955 |       |
| 31 JN387133.1  | 0.964 | 0.957 | 0.961 | 0.955 | 0.964 | 0.96  | 0.956 | 0.956 | 0.961 | 0.959 | 0.956 | 0.956 | 0.959 | 0.962 | 0.962 | 0.962 | 0.96  | 0.961 | 0.956 | 0.954 | 0.961 | 0.961 | 0.957 | 0.938 | 0.951 | 0.957 | 0.952 | 0.955 | 0.957 | ID    | 0.962 | 0.962 | 0.962 |       |
| 32 KC161964.1  | 0.971 | 0.962 | 0.961 | 0.964 | 0.966 | 0.967 | 0.959 | 0.959 | 0.965 | 0.962 | 0.961 | 0.961 | 0.956 | 0.967 | 0.965 | 0.965 | 0.964 | 0.964 | 0.961 | 0.962 | 0.959 | 0.964 | 0.949 | 0.96  | 0.949 | 0.96  | 0.949 | 0.964 | 0.964 | 0.954 | 0.956 | 0.962 | ID    | 0.954 |
| 33 KM1068048.1 | 0.957 | 0.949 | 0.952 | 0.949 | 0.955 | 0.954 | 0.95  | 0.947 | 0.95  | 0.949 | 0.947 | 0.947 | 0.947 | 0.954 | 0.951 | 0.951 | 0.951 | 0.957 | 0.95  | 0.952 | 0.956 | 0.949 | 0.949 | 0.928 | 0.95  | 0.949 | 0.952 | 0.97  | 0.957 | 0.955 | 0.962 | 0.954 | ID    |       |

### Supplementary Table 9m Deduced amino acid sequence similarities of the CaKoV 3D gene

| Sequences  | 1  | 2  | 3 | 4     | 5 | 6 | 7 | 8     | 9 | 10    | 11 | 12 | 13    | 14    | 15    | 16 | 17 | 18 | 19 | 20 | 21    | 22    | 23 | 24    | 25    | 26 | 27    | 28    | 29    | 30    | 31    | 32 | 33    |
|------------|----|----|---|-------|---|---|---|-------|---|-------|----|----|-------|-------|-------|----|----|----|----|----|-------|-------|----|-------|-------|----|-------|-------|-------|-------|-------|----|-------|
| 1 PP320363 | ID | 1  | 1 | 0.996 | 1 | 1 | 1 | 0.996 | 1 | 0.996 | 1  | 1  | 0.988 | 0.996 | 1     | 1  | 1  | 1  | 1  | 1  | 0.996 | 0.992 | 1  | 0.985 | 0.996 | 1  | 0.988 | 0.988 | 0.992 | 0.996 | 0.992 | 1  | 0.996 |
| 2 PP320367 | 1  | ID | 1 | 0.996 | 1 | 1 | 1 | 0.996 | 1 | 0.996 | 1  | 1  | 1     | 0.988 | 0.996 | 1  | 1  |    |    |    |       |       |    |       |       |    |       |       |       |       |       |    |       |
